# Supplementary material for: Changes in Chemical Composition of Lentils, Including Gamma-Aminobutyric Acid and Volatile Compound Formation during Submerged and Solid-State Fermentation with Pediococcus acidilactici
Source: MDPI journal article supplement (doi:10.3390/foods13081249), 2024-04-19
Supplement: s1 [file s1]

## Supplementary information

**Table S1.** Significance of analysed factors (different growing conditions of lentils, different fermentation conditions and different duration of fermentation) and their interaction in lentil wholemeal pH, chromaticity and lactic acid bacteria (LAB) viable counts.

| Factor                 | Dependent variable | p      |
|------------------------|--------------------|--------|
| Growing conditions     | pH                 | <0.001 |
|                        | L*                 | <0.001 |
|                        | a*                 | <0.001 |
|                        | b*                 | <0.001 |
|                        | LAB count          | 0.093  |
| Type of fermentation   | pH                 | <0.001 |
|                        | L*                 | <0.001 |
|                        | a*                 | <0.001 |
|                        | b*                 | <0.001 |
|                        | LAB count          | 0.005  |
| Fermentation duration  | pH                 | <0.001 |
|                        | L*                 | <0.001 |
|                        | a*                 | <0.001 |
|                        | b*                 | <0.001 |
|                        | LAB count          | <0.001 |
| Growing conditions *   | pH                 | <0.001 |
| Type of fermentation   | L*                 | <0.001 |
|                        | a*                 | 0.005  |
|                        | b*                 | 0.002  |
|                        | LAB count          | 0.682  |
| Growing conditions *   | pH                 | 0.312  |
| Fermentation duration  | L*                 | <0.001 |
|                        | a*                 | <0.001 |
|                        | b*                 | <0.001 |
|                        | LAB count          | 0.030  |
| Type of fermentation * | pH                 | <0.001 |
| Fermentation duration  | L*                 | <0.001 |
|                        | a*                 | <0.001 |
|                        | b*                 | <0.001 |
|                        | LAB count          | 0.522  |
| Growing conditions *   | pH                 | <0.001 |
| Type of fermentation * | L*                 | <0.001 |
| Fermentation duration  | a*                 | 0.829  |
|                        | b*                 | <0.001 |
|                        | LAB count          | 0.522  |

L\* – lightness; a\* – redness (–a\* greenness); b\* – yellowness (–b\* blueness); LAB – lactic acid bacteria, p – significance. The

---

influence of analysed factors and their interaction are significant, when  $p \leq 0.05$ . In **Bold** letters are marked significant values.

---

**Table S2.** Pearson correlations between the pH, chromaticity and lactic acid bacteria (LAB) viable counts in lentil wholemeal samples.

|           |                     | pH              | L*              | a*              | b*              | LAB count       |
|-----------|---------------------|-----------------|-----------------|-----------------|-----------------|-----------------|
| pH        | Pearson Correlation | 1               | <b>0.763**</b>  | <b>-0.679**</b> | <b>0.839**</b>  | <b>-0.886**</b> |
|           | Sig. (2-tailed)     |                 | <0.001          | <0.001          | <0.001          | <0.001          |
| L*        | Pearson Correlation | <b>0.763**</b>  | 1               | <b>-0.871**</b> | <b>0.955**</b>  | <b>-0.710**</b> |
|           | Sig. (2-tailed)     | <0.001          |                 | <0.001          | <0.001          | <0.001          |
| a*        | Pearson Correlation | <b>-0.679**</b> | <b>-0.871**</b> | 1               | <b>-0.797**</b> | <b>0.552**</b>  |
|           | Sig. (2-tailed)     | <0.001          | <0.001          |                 | <0.001          | <0.001          |
| b*        | Pearson Correlation | <b>0.839**</b>  | <b>0.955**</b>  | <b>-0.797**</b> | 1               | <b>-0.799**</b> |
|           | Sig. (2-tailed)     | <0.001          | <0.001          | <0.001          |                 | <0.001          |
| LAB count | Pearson Correlation | <b>-0.886**</b> | <b>-0.710**</b> | <b>0.552**</b>  | <b>-0.799**</b> | 1               |
|           | Sig. (2-tailed)     | <0.001          | <0.001          | <0.001          | <0.001          |                 |

L\* – lightness; a\* – redness (–a\* greenness); b\* – yellowness (–b\* blueness); LAB – lactic acid bacteria; \*\* Correlation is significant at the 0.01 level (2-tailed). \* Correlation is significant at the 0.05 level (2-tailed). In **Bold** letters are marked significant values.

**Table S3.** Significance of analysed factors (different growing conditions of lentils, different fermentation conditions and different duration of fermentation) and their interaction in lentil wholemeal free amino acids (FAA) and  $\gamma$ -aminobutyric acid (GABA).

| Factor             | Dependent variable | p                |
|--------------------|--------------------|------------------|
| Growing conditions | Arginine           | <b>&lt;0.001</b> |
|                    | Glutamine          | <b>&lt;0.001</b> |
|                    | Asparagine         | <b>&lt;0.001</b> |
|                    | Glutamic acid      | <b>0.008</b>     |
|                    | Serine             | <b>&lt;0.001</b> |
|                    | Aspartic acid      | <b>&lt;0.001</b> |
|                    | Threonine          | <b>&lt;0.001</b> |
|                    | Glycine            | 0.259            |
|                    | Alanine            | 0.683            |
|                    | GABA               | <b>&lt;0.001</b> |
|                    | Proline            | <b>&lt;0.001</b> |
|                    | Valine             | <b>&lt;0.001</b> |
|                    | Methionine         | <b>&lt;0.001</b> |
|                    | Phenylalanine      | <b>0.006</b>     |
|                    | Leucine/Isoleucine | <b>&lt;0.001</b> |
|                    | Lysine             | <b>&lt;0.001</b> |

|                                              |                    |                  |
|----------------------------------------------|--------------------|------------------|
|                                              | histidine          | 0.363            |
|                                              | Tyrosine           | <b>0.048</b>     |
| Type of fermentation                         | Arginine           | <b>&lt;0.001</b> |
|                                              | Glutamine          | <b>&lt;0.001</b> |
|                                              | Asparagine         | <b>&lt;0.001</b> |
|                                              | Glutamic acid      | <b>0.002</b>     |
|                                              | Serine             | <b>&lt;0.001</b> |
|                                              | Aspartic acid      | <b>&lt;0.001</b> |
|                                              | Threonine          | <b>&lt;0.001</b> |
|                                              | Glycine            | <b>&lt;0.001</b> |
|                                              | Alanine            | <b>&lt;0.001</b> |
|                                              | GABA               | <b>&lt;0.001</b> |
|                                              | Proline            | <b>&lt;0.001</b> |
|                                              | Valine             | <b>&lt;0.001</b> |
|                                              | Methionine         | <b>0.032</b>     |
|                                              | Phenylalanine      | <b>&lt;0.001</b> |
|                                              | Leucine/Isoleucine | <b>&lt;0.001</b> |
|                                              | Lysine             | <b>&lt;0.001</b> |
|                                              | histidine          | <b>&lt;0.001</b> |
|                                              | Tyrosine           | <b>&lt;0.001</b> |
| Fermentation duration                        | Arginine           | <b>&lt;0.001</b> |
|                                              | Glutamine          | <b>&lt;0.001</b> |
|                                              | Asparagine         | 0.197            |
|                                              | Glutamic acid      | <b>&lt;0.001</b> |
|                                              | Serine             | <b>&lt;0.001</b> |
|                                              | Aspartic acid      | <b>&lt;0.001</b> |
|                                              | Threonine          | <b>&lt;0.001</b> |
|                                              | Glycine            | <b>&lt;0.001</b> |
|                                              | Alanine            | <b>0.008</b>     |
|                                              | GABA               | <b>0.042</b>     |
|                                              | Proline            | <b>&lt;0.001</b> |
|                                              | Valine             | <b>&lt;0.001</b> |
|                                              | Methionine         | <b>&lt;0.001</b> |
|                                              | Phenylalanine      | <b>&lt;0.001</b> |
|                                              | Leucine/Isoleucine | <b>&lt;0.001</b> |
|                                              | Lysine             | <b>&lt;0.001</b> |
|                                              | histidine          | 1.000            |
|                                              | Tyrosine           | <b>&lt;0.001</b> |
| Growing conditions *<br>Type of fermentation | Arginine           | <b>&lt;0.001</b> |
|                                              | Glutamine          | <b>&lt;0.001</b> |
|                                              | Asparagine         | <b>0.003</b>     |
|                                              | Glutamic acid      | 0.532            |
|                                              | Serine             | <b>&lt;0.001</b> |
|                                              | Aspartic acid      | 0.156            |
|                                              | Threonine          | <b>0.003</b>     |
|                                              | Glycine            | <b>&lt;0.001</b> |

|                                                          |                    |                  |
|----------------------------------------------------------|--------------------|------------------|
|                                                          | Alanine            | <b>&lt;0.001</b> |
|                                                          | GABA               | <b>&lt;0.001</b> |
|                                                          | Proline            | 0.275            |
|                                                          | Valine             | 0.310            |
|                                                          | Methionine         | 0.912            |
|                                                          | Phenylalanine      | 0.192            |
|                                                          | Leucine/Isoleucine | <b>0.039</b>     |
|                                                          | Lysine             | <b>0.042</b>     |
|                                                          | histidine          | <b>0.007</b>     |
|                                                          | Tyrosine           | 0.668            |
|                                                          | Arginine           | <b>&lt;0.001</b> |
|                                                          | Glutamine          | <b>&lt;0.001</b> |
|                                                          | Asparagine         | 0.618            |
|                                                          | Glutamic acid      | 0.446            |
|                                                          | Serine             | <b>0.002</b>     |
|                                                          | Aspartic acid      | 0.150            |
|                                                          | Threonine          | 0.265            |
|                                                          | Glycine            | 0.891            |
|                                                          | Alanine            | 0.273            |
|                                                          | GABA               | <b>0.003</b>     |
| Growing<br>conditions *<br>Fermentation<br>duration      | Proline            | 0.200            |
|                                                          | Valine             | <b>0.006</b>     |
|                                                          | Methionine         | 0.075            |
|                                                          | Phenylalanine      | <b>&lt;0.001</b> |
|                                                          | Leucine/Isoleucine | <b>&lt;0.001</b> |
|                                                          | Lysine             | <b>&lt;0.001</b> |
|                                                          | histidine          | <b>0.013</b>     |
|                                                          | Tyrosine           | <b>&lt;0.001</b> |
|                                                          | Arginine           | <b>&lt;0.001</b> |
|                                                          | Glutamine          | <b>&lt;0.001</b> |
|                                                          | Asparagine         | 0.391            |
|                                                          | Glutamic acid      | <b>0.003</b>     |
|                                                          | Serine             | <b>&lt;0.001</b> |
|                                                          | Aspartic acid      | <b>&lt;0.001</b> |
|                                                          | Threonine          | <b>0.047</b>     |
|                                                          | Glycine            | <b>0.005</b>     |
|                                                          | Alanine            | 0.116            |
|                                                          | GABA               | <b>0.017</b>     |
|                                                          | Proline            | 0.919            |
|                                                          | Valine             | <b>&lt;0.001</b> |
| Type of<br>fermentation<br>*<br>Fermentation<br>duration | Methionine         | <b>&lt;0.001</b> |
|                                                          | Phenylalanine      | <b>0.004</b>     |
|                                                          | Leucine/Isoleucine | <b>&lt;0.001</b> |
|                                                          | Lysine             | 0.175            |
|                                                          | histidine          | <b>&lt;0.001</b> |
|                                                          | Tyrosine           | <b>&lt;0.001</b> |

|                                                                                     |                    |                  |
|-------------------------------------------------------------------------------------|--------------------|------------------|
| Growing<br>conditions *<br>Type of<br>fermentation<br>*<br>Fermentation<br>duration | Arginine           | <b>&lt;0.001</b> |
|                                                                                     | Glutamine          | <b>&lt;0.001</b> |
|                                                                                     | Asparagine         | 0.274            |
|                                                                                     | Glutamic acid      | 0.073            |
|                                                                                     | Serine             | 0.383            |
|                                                                                     | Aspartic acid      | 0.062            |
|                                                                                     | Threonine          | 0.553            |
|                                                                                     | Glycine            | 0.683            |
|                                                                                     | Alanine            | 0.637            |
|                                                                                     | GABA               | <b>&lt;0.001</b> |
|                                                                                     | Proline            | 0.919            |
|                                                                                     | Valine             | 0.672            |
|                                                                                     | Methionine         | 0.137            |
|                                                                                     | Phenylalanine      | 0.219            |
|                                                                                     | Leucine/Isoleucine | 0.415            |
|                                                                                     | Lysine             | 0.407            |
|                                                                                     | histidine          | 0.230            |
|                                                                                     | Tyrosine           | <b>0.004</b>     |

The influence of analysed factors and their interaction are significant when  $p \leq 0.05$ . In **Bold** letters are marked significant values.

**Table S4.** Pearson correlations between the free amino acids (FAA) and  $\gamma$ -aminobutyric acid (GABA) and pH and lactic acid bacteria (LAB) viable counts in lentil whole samples.

|               |                     | pH              | LAB count       |
|---------------|---------------------|-----------------|-----------------|
| Arginine      | Pearson Correlation | <b>0.784**</b>  | <b>-0.892**</b> |
|               | Sig. (2-tailed)     | <0.001          | <0.001          |
| Glutamine     | Pearson Correlation | <b>0.479**</b>  | <b>-0.593**</b> |
|               | Sig. (2-tailed)     | 0.003           | <0.001          |
| Asparagine    | Pearson Correlation | 0.103           | -0.232          |
|               | Sig. (2-tailed)     | 0.548           | 0.173           |
| Glutamic acid | Pearson Correlation | <b>-0.828**</b> | <b>0.869**</b>  |
|               | Sig. (2-tailed)     | <0.001          | <0.001          |
| Serine        | Pearson Correlation | -0.010          | -0.136          |
|               | Sig. (2-tailed)     | 0.952           | 0.429           |
| Aspartic acid | Pearson Correlation | <b>-0.758**</b> | <b>0.794**</b>  |
|               | Sig. (2-tailed)     | <0.001          | <0.001          |
| Threonine     | Pearson Correlation | <b>-0.670**</b> | <b>0.609**</b>  |
|               | Sig. (2-tailed)     | <0.001          | <0.001          |
| Glycine       | Pearson Correlation | <b>-0.431**</b> | <b>0.369*</b>   |
|               | Sig. (2-tailed)     | 0.009           | 0.027           |
| Alanine       | Pearson Correlation | <b>-0.360*</b>  | <b>0.329*</b>   |
|               | Sig. (2-tailed)     | 0.031           | 0.050           |
| GABA          | Pearson Correlation | -0.032          | 0.049           |
|               | Sig. (2-tailed)     | 0.851           | 0.778           |
| Proline       | Pearson Correlation | <b>-0.608**</b> | <b>0.472**</b>  |

|                                                                                                                                                                                                          |                     |                 |                |
|----------------------------------------------------------------------------------------------------------------------------------------------------------------------------------------------------------|---------------------|-----------------|----------------|
|                                                                                                                                                                                                          | Sig. (2-tailed)     | <0.001          | 0.004          |
| Valine                                                                                                                                                                                                   | Pearson Correlation | <b>-0.709**</b> | <b>0.693**</b> |
|                                                                                                                                                                                                          | Sig. (2-tailed)     | <0.001          | <0.001         |
| Methionine                                                                                                                                                                                               | Pearson Correlation | -0.222          | 0.122          |
|                                                                                                                                                                                                          | Sig. (2-tailed)     | 0.194           | 0.477          |
| Phenylalanine                                                                                                                                                                                            | Pearson Correlation | <b>-0.740**</b> | <b>0.714**</b> |
|                                                                                                                                                                                                          | Sig. (2-tailed)     | <0.001          | <0.001         |
| Leucine/Isoleucine                                                                                                                                                                                       | Pearson Correlation | <b>-0.808**</b> | <b>0.783**</b> |
|                                                                                                                                                                                                          | Sig. (2-tailed)     | <0.001          | <0.001         |
| Lysine                                                                                                                                                                                                   | Pearson Correlation | <b>-0.661**</b> | <b>0.537**</b> |
|                                                                                                                                                                                                          | Sig. (2-tailed)     | <0.001          | <0.001         |
| Histidine                                                                                                                                                                                                | Pearson Correlation | 0.204           | -0.314         |
|                                                                                                                                                                                                          | Sig. (2-tailed)     | 0.232           | 0.062          |
| Tyrosine                                                                                                                                                                                                 | Pearson Correlation | <b>-0.442**</b> | <b>0.433**</b> |
|                                                                                                                                                                                                          | Sig. (2-tailed)     | 0.007           | 0.008          |
| LAB – lactic acid bacteria; ** Correlation is significant at the 0.01 level (2-tailed). * Correlation is significant at the 0.05 level (2-tailed). In <b>Bold</b> letters are marked significant values. |                     |                 |                |

**Table S5.** Pearson correlations between biogenic amines (BA) and free amino acids (FAA),  $\gamma$ -aminobutyric acid (GABA), pH and lactic acid bacteria (LAB) viable counts in lentil whole samples.

|               |                     | PHE             | PUT             | SPRMD          | SPRM           |
|---------------|---------------------|-----------------|-----------------|----------------|----------------|
| pH            | Pearson Correlation | -0.015          | <b>-0.719**</b> | 0.178          | -0.243         |
|               | Sig. (2-tailed)     | 0.931           | <0.001          | 0.299          | 0.154          |
| LAB count     | Pearson Correlation | 0.219           | <b>0.761**</b>  | -0.008         | <b>0.331*</b>  |
|               | Sig. (2-tailed)     | 0.199           | <0.001          | 0.961          | 0.049          |
| Arginine      | Pearson Correlation | -0.214          | <b>-0.686**</b> | 0.235          | -0.152         |
|               | Sig. (2-tailed)     | 0.211           | <0.001          | 0.168          | 0.376          |
| Glutamine     | Pearson Correlation | <b>-0.481**</b> | <b>-0.341*</b>  | 0.271          | <b>0.354*</b>  |
|               | Sig. (2-tailed)     | 0.003           | 0.042           | 0.110          | 0.034          |
| Asparagine    | Pearson Correlation | <b>-0.405*</b>  | 0.268           | -0.073         | -0.002         |
|               | Sig. (2-tailed)     | 0.014           | 0.114           | 0.671          | 0.992          |
| Glutamic acid | Pearson Correlation | 0.069           | <b>0.734**</b>  | -0.020         | <b>0.461**</b> |
|               | Sig. (2-tailed)     | 0.690           | <0.001          | 0.908          | 0.005          |
| Serine        | Pearson Correlation | <b>-0.410*</b>  | -0.085          | 0.105          | <b>0.430**</b> |
|               | Sig. (2-tailed)     | 0.013           | 0.621           | 0.541          | 0.009          |
| Aspartic acid | Pearson Correlation | 0.046           | <b>0.881**</b>  | -0.056         | 0.229          |
|               | Sig. (2-tailed)     | 0.791           | <0.001          | 0.745          | 0.180          |
| Threonine     | Pearson Correlation | -0.250          | <b>0.594**</b>  | 0.041          | <b>0.563**</b> |
|               | Sig. (2-tailed)     | 0.142           | <0.001          | 0.814          | <0.001         |
| Glycine       | Pearson Correlation | <b>-0.343*</b>  | <b>0.349*</b>   | 0.315          | <b>0.644**</b> |
|               | Sig. (2-tailed)     | 0.041           | 0.037           | 0.062          | <0.001         |
| Alanine       | Pearson Correlation | -0.237          | 0.312           | 0.314          | <b>0.787**</b> |
|               | Sig. (2-tailed)     | 0.164           | 0.064           | 0.062          | <0.001         |
| GABA          | Pearson Correlation | -0.329          | -0.066          | <b>0.424**</b> | <b>0.566**</b> |
|               | Sig. (2-tailed)     | 0.050           | 0.700           | 0.010          | <0.001         |
| Proline       | Pearson Correlation | <b>-0.342*</b>  | <b>0.468**</b>  | 0.023          | <b>0.604**</b> |
|               | Sig. (2-tailed)     | 0.041           | 0.004           | 0.895          | <0.001         |
| Valine        | Pearson Correlation | -0.097          | <b>0.614**</b>  | 0.065          | <b>0.520**</b> |
|               | Sig. (2-tailed)     | 0.575           | <0.001          | 0.704          | 0.001          |

|                    |                     |                |                |                |                |
|--------------------|---------------------|----------------|----------------|----------------|----------------|
| Methionine         | Pearson Correlation | -0.112         | 0.319          | <b>0.356*</b>  | 0.211          |
|                    | Sig. (2-tailed)     | 0.516          | 0.058          | 0.033          | 0.217          |
| Phenylalanine      | Pearson Correlation | -0.046         | <b>0.639**</b> | 0.067          | <b>0.610**</b> |
|                    | Sig. (2-tailed)     | 0.792          | <0.001         | 0.697          | <0.001         |
| Leucine/Isoleucine | Pearson Correlation | -0.016         | <b>0.697**</b> | 0.027          | <b>0.425**</b> |
|                    | Sig. (2-tailed)     | 0.925          | <0.001         | 0.876          | 0.010          |
| Lysine             | Pearson Correlation | -0.298         | <b>0.583**</b> | 0.052          | <b>0.575**</b> |
|                    | Sig. (2-tailed)     | 0.077          | <0.001         | 0.763          | <0.001         |
| histidine          | Pearson Correlation | <b>-0.339*</b> | -0.181         | 0.316          | <b>0.668**</b> |
|                    | Sig. (2-tailed)     | 0.043          | 0.290          | 0.061          | <0.001         |
| Tyrosine           | Pearson Correlation | 0.043          | 0.313          | <b>0.534**</b> | <b>0.466**</b> |
|                    | Sig. (2-tailed)     | 0.804          | 0.063          | <0.001         | 0.004          |

TRIP – tryptamine; PHE – phenylethylamine; PUT – putrescine; CAD – cadaverine; HIS – histamine; TYR – tyramine; SPRMD – spermidine; SPRM – spermine; BA – biogenic amines; LAB – lactic acid bacteria. \*\* Correlation is significant at the 0.01 level (2-tailed). \* Correlation is significant at the 0.05 level (2-tailed). In **Bold** letters are marked significant values.

**Table S6.** Significance of analysed factors (different growing conditions of lentils, different fermentation conditions and different duration of fermentation) and their interaction in biogenic amine (BA) lentil wholemeal concentration.

| Factor                                                            | Dependent variable | p            |
|-------------------------------------------------------------------|--------------------|--------------|
| Growing conditions                                                | PHE                | <0.001       |
|                                                                   | PUT                | <0.001       |
|                                                                   | SPRMD              | <0.001       |
|                                                                   | SPRM               | 0.170        |
| Type of fermentation                                              | PHE                | <0.001       |
|                                                                   | PUT                | <0.001       |
|                                                                   | SPRMD              | 0.066        |
|                                                                   | SPRM               | <0.001       |
| Fermentation duration                                             | PHE                | <0.001       |
|                                                                   | PUT                | <0.001       |
|                                                                   | SPRMD              | <0.001       |
|                                                                   | SPRM               | 0.249        |
| Growing conditions * Type of fermentation                         | PHE                | <0.001       |
|                                                                   | PUT                | <b>0.019</b> |
|                                                                   | SPRMD              | <0.001       |
|                                                                   | SPRM               | <0.001       |
| Growing conditions * Fermentation duration                        | PHE                | <0.001       |
|                                                                   | PUT                | 0.102        |
|                                                                   | SPRMD              | <0.001       |
|                                                                   | SPRM               | <b>0.040</b> |
| Type of fermentation * Fermentation duration                      | PHE                | <0.001       |
|                                                                   | PUT                | 0.117        |
|                                                                   | SPRMD              | <0.001       |
|                                                                   | SPRM               | 0.220        |
| Growing conditions * Type of fermentation * Fermentation duration | PHE                | <0.001       |
|                                                                   | PUT                | 0.154        |
|                                                                   | SPRMD              | <0.001       |
|                                                                   | SPRM               | 0.937        |

p – significance; TRIP – tryptamine; PHE – phenylethylamine; PUT – putrescine; CAD – cadaverine; HIS – histamine; TYR – tyramine; SPRMD – spermidine; SPRM – spermine; BA – biogenic amines. The influence of analysed factors and their interaction are significant when  $p \leq 0.05$ . In **Bold** letters are marked significant values.

**Table S7.** Pearson correlations between fatty acids (FA) and pH and lactic acid bacteria (LAB) viable counts in lentil wholemeal samples.

|                                                                                                                                                                                                                                                                                                                                                                                                               |                     | pH     | LAB count     |
|---------------------------------------------------------------------------------------------------------------------------------------------------------------------------------------------------------------------------------------------------------------------------------------------------------------------------------------------------------------------------------------------------------------|---------------------|--------|---------------|
| C14:0                                                                                                                                                                                                                                                                                                                                                                                                         | Pearson Correlation | 0.159  | 0.148         |
|                                                                                                                                                                                                                                                                                                                                                                                                               | Sig. (2-tailed)     | 0.355  | 0.388         |
| C16:0                                                                                                                                                                                                                                                                                                                                                                                                         | Pearson Correlation | 0.212  | -0.028        |
|                                                                                                                                                                                                                                                                                                                                                                                                               | Sig. (2-tailed)     | 0.214  | 0.873         |
| C18:0                                                                                                                                                                                                                                                                                                                                                                                                         | Pearson Correlation | -0.112 | <b>0.363*</b> |
|                                                                                                                                                                                                                                                                                                                                                                                                               | Sig. (2-tailed)     | 0.517  | 0.030         |
| C18:1                                                                                                                                                                                                                                                                                                                                                                                                         | Pearson Correlation | -0.041 | 0.014         |
|                                                                                                                                                                                                                                                                                                                                                                                                               | Sig. (2-tailed)     | 0.811  | 0.937         |
| C18:2                                                                                                                                                                                                                                                                                                                                                                                                         | Pearson Correlation | -0.069 | 0.026         |
|                                                                                                                                                                                                                                                                                                                                                                                                               | Sig. (2-tailed)     | 0.689  | 0.879         |
| C18:3<br>$\alpha$                                                                                                                                                                                                                                                                                                                                                                                             | Pearson Correlation | 0.031  | -0.032        |
|                                                                                                                                                                                                                                                                                                                                                                                                               | Sig. (2-tailed)     | 0.857  | 0.855         |
| C20:0                                                                                                                                                                                                                                                                                                                                                                                                         | Pearson Correlation | -0.235 | 0.249         |
|                                                                                                                                                                                                                                                                                                                                                                                                               | Sig. (2-tailed)     | 0.168  | 0.142         |
| C20:1                                                                                                                                                                                                                                                                                                                                                                                                         | Pearson Correlation | -0.240 | 0.088         |
|                                                                                                                                                                                                                                                                                                                                                                                                               | Sig. (2-tailed)     | 0.159  | 0.608         |
| C14:0 - tetradecanoic acid; C16:0 - palmitic acid; C18:0 - stearic acid; C18:1 - 9-octadecenoic acid; C18:2 - linoleic acid; C18:3 $\alpha$ - $\alpha$ -linolenic acid; C20:0 - eicosanoic acid; C20:1 - cis-11-eicosenoic acid. ** Correlation is significant at the 0.01 level (2-tailed). * Correlation is significant at the 0.05 level (2-tailed). In <b>Bold</b> letters are marked significant values. |                     |        |               |

**Table S8.** Significance of analysed factors (different growing conditions of lentils, different fermentation conditions and different duration of fermentation) and their interaction in fatty acid (FA) lentil wholemeal composition.

| Factor                                     | Dependent variable | p      |
|--------------------------------------------|--------------------|--------|
| Growing conditions                         | C14:0              | <0.001 |
|                                            | C16:0              | 0.325  |
|                                            | C18:0              | 0.824  |
|                                            | C18:1              | <0.001 |
|                                            | C18:2              | 0.015  |
|                                            | C18:3 $\alpha$     | <0.001 |
|                                            | C20:0              | <0.001 |
|                                            | C20:1              | <0.001 |
| Type of fermentation                       | C14:0              | <0.001 |
|                                            | C16:0              | <0.001 |
|                                            | C18:0              | 0.364  |
|                                            | C18:1              | <0.001 |
|                                            | C18:2              | 0.398  |
|                                            | C18:3 $\alpha$     | <0.001 |
|                                            | C20:0              | <0.001 |
|                                            | C20:1              | <0.001 |
| Fermentation duration                      | C14:0              | <0.001 |
|                                            | C16:0              | <0.001 |
|                                            | C18:0              | 0.276  |
|                                            | C18:1              | 0.881  |
|                                            | C18:2              | 0.125  |
|                                            | C18:3 $\alpha$     | 0.005  |
|                                            | C20:0              | <0.001 |
|                                            | C20:1              | <0.001 |
| Growing conditions * Type of fermentation  | C14:0              | <0.001 |
|                                            | C16:0              | 0.022  |
|                                            | C18:0              | <0.001 |
|                                            | C18:1              | 0.376  |
|                                            | C18:2              | 0.113  |
|                                            | C18:3 $\alpha$     | 0.031  |
|                                            | C20:0              | <0.001 |
|                                            | C20:1              | <0.001 |
| Growing conditions * Fermentation duration | C14:0              | <0.001 |
|                                            | C16:0              | <0.001 |
|                                            | C18:0              | <0.001 |
|                                            | C18:1              | 0.552  |
|                                            | C18:2              | 0.003  |
|                                            | C18:3 $\alpha$     | 0.012  |
|                                            | C20:0              | <0.001 |
|                                            | C20:1              | <0.001 |
|                                            | C14:0              | <0.001 |

|                                                                                                                                                                                                                                                                                                                                                                                                        |                |                  |
|--------------------------------------------------------------------------------------------------------------------------------------------------------------------------------------------------------------------------------------------------------------------------------------------------------------------------------------------------------------------------------------------------------|----------------|------------------|
| Type of fermentation *<br>Fermentation duration                                                                                                                                                                                                                                                                                                                                                        | C16:0          | <b>0.005</b>     |
|                                                                                                                                                                                                                                                                                                                                                                                                        | C18:0          | <b>&lt;0.001</b> |
|                                                                                                                                                                                                                                                                                                                                                                                                        | C18:1          | 0.376            |
|                                                                                                                                                                                                                                                                                                                                                                                                        | C18:2          | 0.102            |
|                                                                                                                                                                                                                                                                                                                                                                                                        | C18:3 $\alpha$ | <b>0.005</b>     |
|                                                                                                                                                                                                                                                                                                                                                                                                        | C20:0          | <b>&lt;0.001</b> |
|                                                                                                                                                                                                                                                                                                                                                                                                        | C20:1          | <b>&lt;0.001</b> |
| Growing conditions * Type of fermentation *<br>Fermentation duration                                                                                                                                                                                                                                                                                                                                   | C14:0          | <b>&lt;0.001</b> |
|                                                                                                                                                                                                                                                                                                                                                                                                        | C16:0          | <b>&lt;0.001</b> |
|                                                                                                                                                                                                                                                                                                                                                                                                        | C18:0          | <b>&lt;0.001</b> |
|                                                                                                                                                                                                                                                                                                                                                                                                        | C18:1          | <b>0.020</b>     |
|                                                                                                                                                                                                                                                                                                                                                                                                        | C18:2          | <b>0.002</b>     |
|                                                                                                                                                                                                                                                                                                                                                                                                        | C18:3 $\alpha$ | <b>0.012</b>     |
|                                                                                                                                                                                                                                                                                                                                                                                                        | C20:0          | <b>&lt;0.001</b> |
|                                                                                                                                                                                                                                                                                                                                                                                                        | C20:1          | <b>&lt;0.001</b> |
| p – significance; C14:0 - tetradecanoic acid; C16:0 - palmitic acid; C18:0 - stearic acid; C18:1 - 9-octadecenoic acid; C18:2 - linoleic acid; C18:3 $\alpha$ - $\alpha$ -linolenic acid; C20:0 - eicosanoic acid; C20:1 - cis-11-eicosenoic acid. The influence of analysed factors and their interaction are significant, when $p \leq 0.05$ . In <b>Bold</b> letters are marked significant values. |                |                  |

**Table S9.** Volatile compound (VC) profile (% from the total volatile compounds content) in lentil whole samples.

| Name                | LR                            |                                 |                                |                                |                                |                                | L                             |                                |                                 |                                |                                |                                |
|---------------------|-------------------------------|---------------------------------|--------------------------------|--------------------------------|--------------------------------|--------------------------------|-------------------------------|--------------------------------|---------------------------------|--------------------------------|--------------------------------|--------------------------------|
|                     | C <sub>LR</sub> SM            | C <sub>LR</sub> SS              | SMF <sub>LR</sub> 24           | SMF <sub>LR</sub> 48           | SSF <sub>LR</sub> 24           | SSF <sub>LR</sub> 48           | C <sub>L</sub> SM             | C <sub>L</sub> SS              | SMF <sub>L</sub> 24             | SMF <sub>L</sub> 48            | SSF <sub>L</sub> 24            | SSF <sub>L</sub> 48            |
| Hexanal             | 23.82<br>±2.25 <sup>a,D</sup> | 15.50<br>±1.51 <sup>b,B</sup>   | nd                             | nd                             | 18.71<br>±1.38 <sup>b,C</sup>  | 9.57<br>±0.47 <sup>b,A</sup>   | 30.77<br>±1.74 <sup>b,D</sup> | 8.70<br>±0.656 <sup>a,B</sup>  | 7.95<br>±0.262 <sup>a,B</sup>   | nd                             | 10.52<br>±0.56 <sup>a,C</sup>  | 3.12<br>±0.23 <sup>a,A</sup>   |
| 2-Hexenal           | 4.89<br>±0.48 <sup>a,C</sup>  | 3.15<br>±0.242 <sup>a,B</sup>   | nd                             | nd                             | 0.546<br>±0.029 <sup>a,A</sup> | nd                             | 11.16<br>±0.49 <sup>b,A</sup> | nd                             | nd                              | nd                             | nd                             | nd                             |
| 1-Hexanol           | 35.03<br>±1.33 <sup>b,D</sup> | 31.10<br>±1.66 <sup>b,C,D</sup> | 5.44<br>±0.368 <sup>a,A</sup>  | 22.22<br>±2.06 <sup>b,B</sup>  | 28.54<br>±1.19 <sup>a,C</sup>  | 32.85<br>±1.20 <sup>b,D</sup>  | 21.41<br>±1.46 <sup>a,B</sup> | 25.05<br>±0.917 <sup>a,C</sup> | 26.72<br>±1.25 <sup>b,C</sup>   | 14.00<br>±0.996 <sup>a,A</sup> | 32.17<br>±2.14 <sup>b,D</sup>  | 27.45<br>±1.67 <sup>a,C</sup>  |
| Hept-2-enal         | nd                            | nd                              | 0.252<br>±0.015 <sup>a,A</sup> | nd                             | 0.830<br>±0.079 <sup>a,B</sup> | 1.20<br>±0.107 <sup>a,C</sup>  | nd                            | nd                             | 0.415<br>±0.022 <sup>b,A</sup>  | nd                             | nd                             | nd                             |
| Benzaldehyde        | nd                            | nd                              | 0.629<br>±0.06 <sup>a,A</sup>  | nd                             | 3.53<br>±0.276 <sup>a,B</sup>  | 6.05<br>±0.366 <sup>a,C</sup>  | nd                            | nd                             | nd                              | nd                             | 5.52<br>±0.433 <sup>b,A</sup>  | 6.63<br>±0.49 <sup>a,B</sup>   |
| Vinyl amyl carbinol | nd                            | nd                              | nd                             | nd                             | 0.357<br>±0.036 <sup>a,A</sup> | nd                             | nd                            | nd                             | nd                              | nd                             | 0.573<br>±0.042 <sup>b,B</sup> | 0.462<br>±0.024 <sup>a,A</sup> |
| Hexanoic acid       | 4.75<br>±0.311 <sup>a,A</sup> | 5.93<br>±0.471 <sup>a,B</sup>   | 5.58<br>±0.328 <sup>a,B</sup>  | 14.00<br>±0.724 <sup>b,E</sup> | 9.13<br>±0.396 <sup>b,C</sup>  | 11.45<br>±0.519 <sup>b,D</sup> | 5.74<br>±0.479 <sup>b,B</sup> | 7.13<br>±0.633 <sup>a,C</sup>  | 4.98<br>±0.294 <sup>a,A,B</sup> | 4.80<br>±0.206 <sup>a,A</sup>  | 4.63<br>±0.144 <sup>a,A</sup>  | 6.61<br>±0.358 <sup>a,C</sup>  |

|                              |                        |                                |                             |                               |                        |                               |                        |                               |                                |                       |                                    |                     |
|------------------------------|------------------------|--------------------------------|-----------------------------|-------------------------------|------------------------|-------------------------------|------------------------|-------------------------------|--------------------------------|-----------------------|------------------------------------|---------------------|
| Acetic acid<br>hexyl ester   | nd                     | nd                             | nd                          | nd                            | 1.13<br>±0.063<br>b,A  | 2.26<br>±0.072 b,B            | nd                     | nd                            | nd                             | nd                    | 0.782<br>±0.027<br>a,A             | 1.07<br>±0.098 a,B  |
| Oct-3-en-2-<br>one           | nd                     | nd                             | nd                          | nd                            | nd                     | 0.544<br>±0.042<br>a,A        | nd                     | nd                            | nd                             | nd                    | 0.562<br>±0.05<br>a,A              | 0.499<br>±0.031 a,A |
| Phenylacet<br>aldehyde       | 0.14<br>±0.013<br>a,A  | nd                             | nd                          | nd                            | 1.25<br>±0.095 b,B     | 1.39<br>±0.086 a,B            | 0.280<br>±0.015<br>b,A | nd                            | 1.83<br>±0.085 <sup>b, D</sup> | nd                    | 0.995<br>±0.034<br>a,B             | 1.34<br>±0.108 a,C  |
| Oct-2-enal                   | 0.402<br>±0.031<br>a,A | 0.590<br>±0.044 <sup>a,B</sup> | 0.936<br>±0.065 a,C         | nd                            | 2.41<br>±0.132 b,E     | 1.55<br>±0.079<br>b,D         | 0.371<br>±0.029<br>a,A | nd                            | 1.74<br>±0.173 b,C             | nd                    | 1.96<br>±0.144<br>a,C              | 1.35<br>±0.074 a,B  |
| Octahydro-<br>2,3'-bifuran   | nd                     | nd                             | nd                          | nd                            | 0.606<br>±0.041<br>a,A | nd                            | nd                     | nd                            | nd                             | nd                    | 0.879<br>±0.081 <sup>b,</sup><br>A | nd                  |
| Nonanal                      | 0.961<br>±0.072<br>a,A | 1.63<br>±0.104 <sup>a,B</sup>  | 1.83<br>±0.1 <sup>a,C</sup> | 3.27<br>±0.116 <sup>b,D</sup> | 1.93<br>±0.114<br>b,C  | 1.92<br>±0.125 <sup>a,C</sup> | 1.23<br>±0.122<br>b,A  | 1.67<br>±0.132 <sup>a,B</sup> | 1.65<br>±0.093 a,B             | 2.89<br>±0.113<br>a,C | 1.70<br>±0.068<br>a,B              | 1.89<br>±0.175 a,B  |
| Phenethyl<br>alcohol         | nd                     | nd                             | nd                          | nd                            | 2.18<br>±0.117<br>a,A  | 5.58<br>±0.282 a,B            | nd                     | nd                            | 3.70<br>±0.368 <sup>a,B</sup>  | 8.08<br>±0.788<br>a,D | 2.85<br>±0.194<br>b,A              | 5.44<br>±0.198 a,C  |
| 2-<br>ethylhexan<br>oic acid | 0.673<br>±0.065<br>a,A | 1.14<br>±0.074 <sup>a,B</sup>  | 2.00<br>±0.066<br>a,D       | nd                            | 1.91<br>±0.183<br>b,D  | 1.50<br>±0.058<br>b,C         | 0.945<br>±0.065<br>b,A | 2.74<br>±0.186 <sup>b,D</sup> | 2.06<br>±0.202 a,C             | 3.27<br>±0.099<br>a,E | 1.28<br>±0.121<br>a,B              | 0.81<br>±0.073 a,A  |

|                 |                                |                                |                                |                               |                                |                                |                                |                               |                                |                               |                                |                                |
|-----------------|--------------------------------|--------------------------------|--------------------------------|-------------------------------|--------------------------------|--------------------------------|--------------------------------|-------------------------------|--------------------------------|-------------------------------|--------------------------------|--------------------------------|
| Non-2-enal      | 2.86<br>±0.167 <sup>a,C</sup>  | 1.86<br>±0.106 <sup>a,B</sup>  | 1.07<br>±0.091 <sup>a,A</sup>  | nd                            | 2.17<br>±0.214 <sup>b,B</sup>  | 0.930<br>±0.067 <sup>b,A</sup> | 4.90<br>±0.314 <sup>b,D</sup>  | 1.76<br>±0.174 <sup>a,C</sup> | 1.81<br>±0.18 <sup>b,C</sup>   | nd                            | 0.955<br>±0.053 <sup>a,B</sup> | 0.651<br>±0.047 <sup>b,A</sup> |
| Octanoic acid   | 0.876<br>±0.041 <sup>a,A</sup> | 1.81<br>±0.115 <sup>a,C</sup>  | 5.48<br>±0.548 <sup>a,E</sup>  | 3.96<br>±0.292 <sup>a,D</sup> | 3.80<br>±0.312 <sup>b,D</sup>  | 1.52<br>±0.084 <sup>a,B</sup>  | 1.41<br>±0.131 <sup>b,A</sup>  | 4.71<br>±0.193 <sup>b,D</sup> | 5.40<br>±0.325 <sup>a,E</sup>  | 4.47<br>±0.433 <sup>a,D</sup> | 2.77<br>±0.108 <sup>a,C</sup>  | 1.88<br>±0.165 <sup>b,B</sup>  |
| Decanal         | 0.532<br>±0.021 <sup>b,A</sup> | 0.720<br>±0.025 <sup>a,B</sup> | 0.844<br>±0.08 <sup>a,BC</sup> | nd                            | 0.727<br>±0.044 <sup>a,B</sup> | 0.839<br>±0.066 <sup>b,C</sup> | 0.419<br>±0.031 <sup>a,A</sup> | 1.22<br>±0.09 <sup>b,E</sup>  | 0.884<br>±0.043 <sup>a,D</sup> | 1.33<br>±0.059 <sup>a,E</sup> | 0.756<br>±0.036 <sup>a,C</sup> | 0.683<br>±0.022 <sup>a,B</sup> |
| Nona-2,4-dienal | nd                             | nd                             | nd                             | nd                            | nd                             | 0.323<br>±0.032 <sup>a,A</sup> | nd                             | nd                            | nd                             | nd                            | nd                             | 0.306<br>±0.022 <sup>a,A</sup> |
| Dec-2-enal      | nd                             | nd                             | nd                             | nd                            | 0.201<br>±0.015 <sup>a,A</sup> | nd                             | nd                             | nd                            | nd                             | nd                            | 0.294<br>±0.016 <sup>b,B</sup> | 0.171<br>±0.015 <sup>a,A</sup> |
| Nonanoic acid   | 0.510<br>±0.038 <sup>a,A</sup> | 2.05<br>±0.186 <sup>a,B</sup>  | 2.61<br>±0.22 <sup>a,C</sup>   | nd                            | 3.50<br>±0.334 <sup>a,D</sup>  | 2.37<br>±0.203 <sup>b,BC</sup> | 0.789<br>±0.079 <sup>b,A</sup> | 5.33<br>±0.258 <sup>b,E</sup> | 2.53<br>±0.245 <sup>a,C</sup>  | 5.05<br>±0.213 <sup>a,E</sup> | 3.55<br>±0.153 <sup>a,D</sup>  | 1.83<br>±0.18 <sup>a,B</sup>   |
| Anethole        | nd                             | nd                             | nd                             | nd                            | nd                             | nd                             | 3.15<br>±0.272 <sup>a,C</sup>  | 4.56<br>±0.25 <sup>a,D</sup>  | 7.68<br>±0.372 <sup>a,F</sup>  | 6.62<br>±0.658 <sup>a,E</sup> | 1.27<br>±0.045 <sup>a,A</sup>  | 2.19<br>±0.08 <sup>a,B</sup>   |
| Tridecane       | nd                             | nd                             | nd                             | nd                            | nd                             | nd                             | nd                             | nd                            | 0.346<br>±0.024 <sup>a,B</sup> | nd                            | nd                             | 0.234<br>±0.014 <sup>a,A</sup> |
| Undecanal       | 0.133<br>±0.006 <sup>a,A</sup> | nd                             | nd                             | 1.52<br>±0.07 <sup>a,C</sup>  | nd                             | 0.451<br>±0.019 <sup>b,B</sup> | nd                             | nd                            | nd                             | nd                            | 0.090<br>±0.006 <sup>a,A</sup> | 0.240<br>±0.015 <sup>a,B</sup> |

|                                                                                                           |                        |                                    |                               |                               |                                |                                |                               |                               |                                |                        |                              |                               |
|-----------------------------------------------------------------------------------------------------------|------------------------|------------------------------------|-------------------------------|-------------------------------|--------------------------------|--------------------------------|-------------------------------|-------------------------------|--------------------------------|------------------------|------------------------------|-------------------------------|
| 2-methylprop<br>anoic acid<br>2,2-<br>dimethyl-1-<br>(2-hydroxy-<br>1-<br>methylethy<br>l)propyl<br>ester | 2.07<br>±0.087<br>a,A  | 2.56<br>±0.199 <sup>a,B</sup><br>C | 4.72<br>±0.162<br>b,D         | nd                            | 2.91<br>±0.244 <sup>a,C</sup>  | 2.41<br>±0.09 <sup>b,B</sup>   | 1.91<br>±0.169 <sup>a,B</sup> | 3.32<br>±0.319 <sup>b,C</sup> | 3.29<br>±0.165 <sup>a,C</sup>  | 5.86<br>±0.389<br>a,D  | 2.88<br>±0.272<br>a,C        | 1.22<br>±0.094 <sup>a,A</sup> |
| Eugenol                                                                                                   | nd                     | nd                                 | nd                            | nd                            | nd                             | nd                             | 1.36<br>±0.109<br>a,A         | 12.1<br>±0.925 <sup>a,E</sup> | 7.69<br>±0.498 <sup>a,D</sup>  | 12.50<br>±0.757<br>a,E | 2.14<br>±0.144<br>a,B        | 3.72<br>±0.282 <sup>a,C</sup> |
| 2-methylprop<br>anoic acid<br>2-ethyl-3-<br>hydroxyhe<br>xyl ester                                        | 2.53<br>±0.119<br>a,A  | 2.88<br>±0.197 <sup>a,B</sup>      | 5.28<br>±0.419<br>b,D         | 4.91<br>±0.329<br>a,D         | 3.57<br>±0.252 <sup>a,C</sup>  | 3.42<br>±0.228<br>b,C          | 2.57<br>±0.218 <sup>a,B</sup> | 5.57<br>±0.38 <sup>b,D</sup>  | 4.33<br>±0.257 <sup>a,C</sup>  | 9.02<br>±0.829<br>b,E  | 4.17<br>±0.375<br>a,C        | 1.63<br>±0.1 <sup>a,A</sup>   |
| β-<br>Damasceno<br>ne                                                                                     | 2.67<br>±0.189<br>b,A  | 3.52<br>±0.351 <sup>b,B</sup>      | 6.17<br>±0.607 <sup>a,C</sup> | 31.39<br>±2.488<br>b,D        | 2.54<br>±0.13 <sup>a,A</sup>   | 3.92<br>±0.379 <sup>b,B</sup>  | 1.88<br>±0.095 <sup>a,B</sup> | 1.60<br>±0.12 <sup>a,A</sup>  | 5.61<br>±0.308 <sup>a,D</sup>  | 7.86<br>±0.274<br>a,E  | 2.65<br>±0.25 <sup>a,C</sup> | 2.97<br>±0.205 <sup>a,C</sup> |
| 1-<br>Tetradecen<br>e                                                                                     | 0.404<br>±0.016<br>a,A | 1.13<br>±0.057 <sup>a,C</sup>      | nd                            | nd                            | 0.983<br>±0.036 <sup>a,B</sup> | nd                             | nd                            | 2.28<br>±0.223 <sup>b,A</sup> | nd                             | nd                     | nd                           | nd                            |
| Tetradecan<br>e                                                                                           | 0.333<br>±0.011<br>a,A | 0.430<br>±0.03 <sup>a,B</sup>      | 1.14<br>±0.037<br>b,D         | 3.08<br>±0.129 <sup>b,E</sup> | 0.443<br>±0.037 <sup>a,B</sup> | 0.939<br>±0.047 <sup>a,C</sup> | 0.389<br>±0.034<br>b,A        | 0.635<br>±0.03 <sup>b,C</sup> | 0.852<br>±0.084 <sup>a,D</sup> | 2.38<br>±0.113<br>a,F  | 0.542<br>±0.035<br>b,B       | 1.09<br>±0.062 <sup>b,E</sup> |

|                                                               |                               |                                  |                                |                               |                              |                       |                                |                                |                               |                       |                        |                                |
|---------------------------------------------------------------|-------------------------------|----------------------------------|--------------------------------|-------------------------------|------------------------------|-----------------------|--------------------------------|--------------------------------|-------------------------------|-----------------------|------------------------|--------------------------------|
| Dodecanal                                                     | 0.612<br>±0.047<br>a,A        | 1.44<br>±0.114 a,C               | 1.05<br>±0.064 <sup>a,B</sup>  | 2.75<br>±0.127<br>b,D         | 1.28<br>±0.087<br>b,C        | 1.35<br>±0.077<br>b,C | 0.676<br>±0.064 <sup>a,A</sup> | 2.41<br>±0.108 <sup>b,F</sup>  | 1.33<br>±0.056 b,D            | 1.71<br>±0.104<br>a,E | 1.13<br>±0.041<br>a,C  | 0.879<br>±0.041 <sup>a,B</sup> |
| 3-(2,2,6-Trimethyl-7-oxabicyclo[4.1.0]heptan-1-yl)prop-2-enal | 0.63<br>±0.031<br>b,A         | 1.06<br>±0.096 a,B               | 1.53<br>±0.078 <sup>a,C</sup>  | 6.20<br>±0.437<br>b,D         | 1.24<br>±0.106 a,B           | 1.55<br>±0.146<br>b,C | 0.369<br>±0.034<br>a,A         | 1.52<br>±0.047 <sup>b,D</sup>  | 1.43<br>±0.101 a,D            | 3.51<br>±0.235<br>a,E | 1.18<br>±0.042<br>a,C  | 0.811<br>±0.061 <sup>a,B</sup> |
| Tridecanal                                                    | 0.13<br>±0.004 <sup>a,A</sup> | nd                               | nd                             | nd                            | nd                           | nd                    | nd                             | nd                             | nd                            | nd                    | nd                     | nd                             |
| ((Butoxymethyl)ethoxy)methyl-ethoxy)-propanol                 | 1.02<br>±0.039<br>a,A         | 1.64<br>±0.128<br>a <sup>B</sup> | 2.03<br>±0.1 <sup>a,C</sup>    | 4.47<br>±0.306 <sup>a,E</sup> | 2.20<br>±0.15 <sup>b,C</sup> | 2.63<br>±0.101<br>b,D | 1.85<br>±0.069 <sup>b,C</sup>  | 4.02<br>±0.176 <sup>b,E</sup>  | 2.40<br>±0.208 b,D            | 5.95<br>±0.215<br>b,F | 1.63<br>±0.115<br>a,B  | 1.20<br>±0.086 a,A             |
| Hexadecane                                                    | 0.354<br>±0.035<br>a,A        | 0                                | 0.900<br>±0.085 <sup>a,C</sup> | 2.20<br>±0.193 <sup>a,E</sup> | 0.640<br>±0.032 a,B          | 1.04<br>±0.049<br>b,D | nd                             | nd                             | 0.936<br>±0.06 <sup>a,C</sup> | nd                    | 0.821<br>±0.045<br>b,B | 0.521<br>±0.034 a,A            |
| Tetradecanal                                                  | 0.628<br>±0.061<br>a,A        | 0.800<br>±0.043 b,B              | 1.68<br>±0.11 <sup>a,C</sup>   | nd                            | nd                           | nd                    | 0.543<br>±0.034 <sup>a,B</sup> | 0.653<br>±0.058 <sup>a,C</sup> | nd                            | nd                    | 0.462<br>±0.044<br>aA  | 0.881<br>±0.087 a,D            |
| Tridecanedial                                                 | 0.120<br>±0.01 <sup>b,B</sup> | 0.090<br>±0.007<br>a,A           | nd                             | nd                            | nd                           | nd                    | 0.068<br>±0.006 <sup>a,A</sup> | nd                             | 0.247<br>±0.009 a,B           | nd                    | nd                     | 0.310<br>±0.018 a,C            |

|                                  |                                |                                |                                |    |                                |                                |                               |                                |                                 |                                |                                |                                |
|----------------------------------|--------------------------------|--------------------------------|--------------------------------|----|--------------------------------|--------------------------------|-------------------------------|--------------------------------|---------------------------------|--------------------------------|--------------------------------|--------------------------------|
| Pentadecanal                     | 6.03<br>±0.582 <sup>b,B</sup>  | 7.31<br>±0.245 <sup>b,C</sup>  | 23.9<br>±1.085 <sup>b,D</sup>  | nd | 0.581<br>±0.027 <sup>a,A</sup> | nd                             | 2.77<br>±0.096 <sup>a,C</sup> | 1.45<br>±0.087 <sup>a,B</sup>  | 1.19<br>±0.101 <sup>a,A</sup>   | nd                             | 3.42<br>±0.232 <sup>b,D</sup>  | 10.5<br>±0.454 <sup>a,E</sup>  |
| cis,cis-7,10,-<br>Hexadecadienal | 0.069<br>±0.003 <sup>a,A</sup> | nd                             | 0.348<br>±0.028 <sup>a,B</sup> | nd | nd                             | nd                             | nd                            | nd                             | nd                              | nd                             | nd                             | 0.195<br>±0.014 <sup>a,A</sup> |
| 7-<br>Hexadecenal                | nd                             | nd                             | 0.864<br>±0.072 <sup>a,A</sup> | nd | nd                             | nd                             | nd                            | nd                             | nd                              | nd                             | nd                             | nd                             |
| 11-<br>Hexadecyn-<br>-1-ol       | 4.03<br>±0.369 <sup>b,A</sup>  | 5.71<br>±0.525 <sup>b,B</sup>  | 11.02<br>±0.714 <sup>a,C</sup> | nd | nd                             | nd                             | 1.26<br>±0.083 <sup>a,B</sup> | 0.347<br>±0.027 <sup>a,A</sup> | nd                              | nd                             | 1.85<br>±0.095 <sup>a,C</sup>  | 3.50<br>±0.154 <sup>a,D</sup>  |
| 14-methyl-<br>8-<br>Hexadecenal  | 2.55<br>±0.159 <sup>b,A</sup>  | 5.31<br>±0.305 <sup>b,B</sup>  | 10.6<br>±0.652 <sup>b,C</sup>  | nd | nd                             | nd                             | 1.72<br>±0.125 <sup>a,C</sup> | 0.730<br>±0.036 <sup>a,B</sup> | 0.522<br>±0.024 <sup>a,A</sup>  | nd                             | 2.33<br>±0.178 <sup>a,D</sup>  | 3.85<br>±0.294 <sup>a,E</sup>  |
| Methyl<br>hexadecanoate          | nd                             | nd                             | nd                             | nd | nd                             | nd                             | nd                            | nd                             | nd                              | nd                             | nd                             | 0.4964±0.019 <sup>a,A</sup>    |
| Hexadecanoic acid<br>ethyl ester | 0.131<br>±0.009 <sup>a,B</sup> | 0.550<br>±0.026 <sup>b,D</sup> | 1.50<br>±0.113 <sup>b,E</sup>  | nd | 0.080<br>±0.004 <sup>a,A</sup> | 0.349<br>±0.012 <sup>a,C</sup> | nd                            | 0.366<br>±0.034 <sup>a,A</sup> | 0.387<br>±0.038 <sup>a, A</sup> | 0.605<br>±0.043 <sup>a,B</sup> | 0.428<br>±0.04 <sup>b,A</sup>  | 0.793<br>±0.077 <sup>b,C</sup> |
| Ethyl<br>Oleate                  | 0.047<br>±0.004 <sup>a,A</sup> | nd                             | 0.450<br>±0.026 <sup>a,B</sup> | nd | nd                             | nd                             | nd                            | nd                             | nd                              | nd                             | 0.150<br>±0.007 <sup>a,A</sup> | 0.428<br>±0.018 <sup>a,B</sup> |

C – control samples (non-fermented); L – lentil obtained from pure stands; LR – lentils obtained from relay incorporated with winter rye; SM – submerged conditions (lentils/water ratio 1:5, w/w ); SS – submerged conditions (lentils/water ratio 1:1, w/w ); SMF – fermented under submerged conditions; SSF – fermented under solid-state conditions; 24, 48 – duration of fermentation (in hours).

<sup>a-b</sup> Mean values denoted with different letters indicate significantly different values between the different lentil sample groups (LR and L) with the same treatment (SM, SF, SMF24, SMF48, SSF24, SSF48); <sup>A-E</sup> Mean values denoted with different letters indicate significantly different values between different treatment (SM, SF, SMF24, SMF48, SSF24, SSF48) within the same group (LR or L). Results are statistically significant when  $p \leq 0.05$ . nd – not detected.

**Table S10.** Pearson correlations between volatiles (VC) and pH, lactic acid bacteria (LAB) viable counts, biogenic amines (BA) and fatty acid (FA) composition in lentil whole samples.

|                           |                     | pH                  | LAB<br>count        | PHE                 | PUT                 | SPR<br>MD           | SPR<br>M            | C14:<br>0  | C16:<br>0      | C18:<br>0      | C18:<br>1      | C18:<br>2          | C18:<br>3 $\alpha$  | C20:<br>0      | C20:<br>1      |
|---------------------------|---------------------|---------------------|---------------------|---------------------|---------------------|---------------------|---------------------|------------|----------------|----------------|----------------|--------------------|---------------------|----------------|----------------|
| Hexanal                   | Pearson Correlation | <b>0.714**</b>      | -<br><b>0.737**</b> | -<br><b>0.339*</b>  | -<br><b>0.694**</b> | 0.003               | -<br><b>0.389*</b>  | -<br>0.087 | 0.268          | -<br>0.095     | 0.087          | -<br>0.059         | -<br>0.057          | -<br>0.036     | -<br>0.006     |
|                           | Sig. (2-tailed)     | <0.001              | <0.001              | 0.043               | <0.001              | 0.987               | 0.019               | 0.613      | 0.114          | 0.582          | 0.612          | 0.733              | 0.740               | 0.837          | 0.973          |
| 2-Hexenal                 | Pearson Correlation | <b>0.610**</b>      | -<br><b>0.711**</b> | -<br>0.152          | -<br><b>0.642**</b> | -<br>0.043          | -<br><b>0.779**</b> | -<br>0.152 | -<br>0.060     | -<br>0.226     | -<br>0.008     | 0.087              | 0.157               | -<br>0.152     | -<br>0.153     |
|                           | Sig. (2-tailed)     | <0.001              | <0.001              | 0.375               | <0.001              | 0.805               | <0.001              | 0.375      | 0.726          | 0.184          | 0.962          | 0.613              | 0.361               | 0.375          | 0.374          |
| 1-Hexanol                 | Pearson Correlation | 0.212               | -<br>0.299          | -<br><b>0.720**</b> | -<br>0.200          | -<br>0.081          | 0.301               | 0.060      | <b>0.692**</b> | 0.310          | <b>0.335*</b>  | -<br><b>0.336*</b> | -<br><b>0.388*</b>  | 0.284          | 0.259          |
|                           | Sig. (2-tailed)     | 0.214               | 0.077               | <0.001              | 0.242               | 0.640               | 0.074               | 0.730      | <0.001         | 0.066          | 0.046          | 0.045              | 0.019               | 0.094          | 0.127          |
| Hept-2-enal               | Pearson Correlation | -0.162              | <b>0.391*</b>       | 0.022               | -<br>0.004          | <b>0.419*</b>       | <b>0.403*</b>       | 0.150      | <b>0.339*</b>  | <b>0.444**</b> | -<br>0.179     | -<br>0.129         | -<br>0.108          | <b>0.769**</b> | -<br>0.176     |
|                           | Sig. (2-tailed)     | 0.345               | 0.018               | 0.899               | 0.981               | 0.011               | 0.015               | 0.383      | 0.043          | 0.007          | 0.297          | 0.452              | 0.529               | <0.001         | 0.304          |
| Benzaldehyde              | Pearson Correlation | -<br><b>0.541**</b> | <b>0.451**</b>      | -<br>0.141          | <b>0.331*</b>       | -<br>0.165          | <b>0.414*</b>       | -<br>0.213 | 0.241          | 0.133          | <b>0.336*</b>  | -<br>0.103         | -<br><b>0.451**</b> | <b>0.482**</b> | <b>0.422*</b>  |
|                           | Sig. (2-tailed)     | <0.001              | 0.006               | 0.412               | 0.049               | 0.337               | 0.012               | 0.211      | 0.157          | 0.439          | 0.045          | 0.551              | 0.006               | 0.003          | 0.010          |
| Vinyl<br>amyl<br>carbinol | Pearson Correlation | <b>-0.407*</b>      | 0.292               | -<br>0.169          | <b>0.381*</b>       | -<br><b>0.443**</b> | 0.319               | -<br>0.169 | 0.214          | -<br>0.025     | <b>0.478**</b> | -<br>0.132         | -<br><b>0.501**</b> | -<br>0.169     | <b>0.670**</b> |

|                         |                     |                     |                |            |                |                     |                |                |                |                |                |                     |                     |                |                |
|-------------------------|---------------------|---------------------|----------------|------------|----------------|---------------------|----------------|----------------|----------------|----------------|----------------|---------------------|---------------------|----------------|----------------|
|                         | Sig. (2-tailed)     | 0.014               | 0.084          | 0.324      | 0.022          | 0.007               | 0.058          | 0.32<br>4      | 0.209          | 0.88<br>4      | 0.003          | 0.444               | 0.002               | 0.32<br>4      | <0.0<br>01     |
| Hexanoic acid           | Pearson Correlation | <b>-0.419*</b>      | <b>0.361*</b>  | -<br>0.153 | -<br>0.125     | <b>0.344*</b>       | 0.199          | -<br>0.21<br>6 | 0.119          | 0.29<br>9      | <b>0.343*</b>  | 0.112               | <b>0.372*</b>       | <b>0.462**</b> | -<br>0.25<br>4 |
|                         | Sig. (2-tailed)     | 0.011               | 0.031          | 0.373      | 0.467          | 0.040               | 0.244          | 0.20<br>7      | 0.491          | 0.07<br>6      | 0.040          | 0.516               | 0.025               | 0.00<br>5      | 0.13<br>5      |
| Acetic acid hexyl ester | Pearson Correlation | -<br><b>0.438**</b> | <b>0.420*</b>  | -<br>0.188 | 0.143          | 0.135               | <b>0.453**</b> | -<br>0.18<br>8 | 0.265          | 0.23<br>6      | 0.105          | -<br>0.084          | -<br>0.299          | <b>0.786**</b> | 0.14<br>8      |
|                         | Sig. (2-tailed)     | 0.007               | 0.011          | 0.272      | 0.405          | 0.433               | 0.006          | 0.27<br>2      | 0.119          | 0.16<br>6      | 0.542          | 0.625               | 0.077               | <0.0<br>01     | 0.38<br>8      |
| Oct-3-en-2-one          | Pearson Correlation | -<br><b>0.523**</b> | <b>0.365*</b>  | -<br>0.173 | <b>0.359*</b>  | -<br><b>0.374*</b>  | 0.283          | -<br>0.17<br>3 | 0.199          | 0.08<br>2      | <b>0.378*</b>  | -<br>0.121          | -<br><b>0.459**</b> | <b>0.533**</b> | <b>0.557**</b> |
|                         | Sig. (2-tailed)     | 0.001               | 0.029          | 0.313      | 0.031          | 0.024               | 0.095          | 0.31<br>3      | 0.244          | 0.63<br>6      | 0.023          | 0.483               | 0.005               | <0.0<br>01     | <0.0<br>01     |
| Phenylacetaldehyde      | Pearson Correlation | -0.247              | <b>0.426**</b> | -<br>0.270 | <b>0.425**</b> | 0.028               | 0.291          | <b>0.552**</b> | <b>0.656**</b> | <b>0.658**</b> | <b>0.489**</b> | -<br><b>0.558**</b> | -<br><b>0.709**</b> | <b>0.356*</b>  | 0.17<br>6      |
|                         | Sig. (2-tailed)     | 0.146               | 0.010          | 0.111      | 0.010          | 0.871               | 0.085          | <0.0<br>01     | <0.0<br>1      | <0.0<br>01     | 0.002          | <0.0<br>1           | <0.0<br>1           | 0.03<br>3      | 0.30<br>4      |
| Oct-2-enal              | Pearson Correlation | -0.190              | <b>0.390*</b>  | -<br>0.002 | 0.274          | -<br>0.106          | <b>0.401*</b>  | 0.30<br>2      | <b>0.597**</b> | <b>0.472**</b> | 0.248          | -<br><b>0.350*</b>  | -<br><b>0.532**</b> | 0.22<br>8      | <b>0.381*</b>  |
|                         | Sig. (2-tailed)     | 0.268               | 0.019          | 0.992      | 0.106          | 0.540               | 0.015          | 0.07<br>4      | <0.0<br>1      | 0.00<br>4      | 0.144          | 0.036               | <0.0<br>1           | 0.18<br>2      | 0.02<br>2      |
| Octahydro-2,3'-bifuran  | Pearson Correlation | -0.209              | 0.167          | -<br>0.131 | 0.185          | -<br><b>0.538**</b> | 0.313          | -<br>0.13<br>1 | 0.218          | 0.07<br>2      | 0.213          | -<br>0.075          | -<br>0.317          | -<br>0.13<br>1 | <b>0.806**</b> |
|                         | Sig. (2-tailed)     | 0.221               | 0.329          | 0.445      | 0.279          | <0.0<br>1           | 0.063          | 0.44<br>5      | 0.202          | 0.67<br>6      | 0.212          | 0.666               | 0.060               | 0.44<br>5      | <0.0<br>01     |

|                      |                     |                     |                         |                    |                         |       |                         |                   |            |            |                   |            |                        |                    |            |
|----------------------|---------------------|---------------------|-------------------------|--------------------|-------------------------|-------|-------------------------|-------------------|------------|------------|-------------------|------------|------------------------|--------------------|------------|
| Nonanal              | Pearson Correlation | -<br><b>0.760**</b> | <b>0.686</b><br>**      | -<br>0.021         | <b>0.533</b><br>**      | 0.131 | 0.211                   | -<br>0.110        | -<br>0.269 | 0.162      | -<br>0.160        | 0.258      | <b>0.387</b><br>*      | 0.025              | -<br>0.089 |
|                      | Sig. (2-tailed)     | <0.001              | <0.001                  | 0.902              | <0.001                  | 0.446 | 0.217                   | 0.523             | 0.112      | 0.344      | 0.351             | 0.129      | 0.020                  | 0.885              | 0.606      |
| Phenethyl alcohol    | Pearson Correlation | -<br><b>0.636**</b> | <b>0.639</b><br>**      | -<br>0.257         | <b>0.799</b><br>**      | 0.086 | 0.312                   | 0.156             | -<br>0.067 | 0.221      | <b>0.420</b><br>* | -<br>0.085 | -<br><b>0.366</b><br>* | <b>0.36</b><br>3*  | 0.060      |
|                      | Sig. (2-tailed)     | <0.001              | <0.001                  | 0.131              | <0.001                  | 0.619 | 0.064                   | 0.365             | 0.698      | 0.196      | 0.011             | 0.623      | 0.028                  | 0.030              | 0.730      |
| 2-ethylhexanoic acid | Pearson Correlation | 0.025               | 0.152                   | 0.161              | <b>0.389</b><br>*       | 0.292 | <b>0.392</b><br>*       | 0.184             | -<br>0.298 | -<br>0.144 | 0.213             | 0.175      | -<br>0.077             | -<br>0.009         | -<br>0.082 |
|                      | Sig. (2-tailed)     | 0.887               | 0.375                   | 0.348              | 0.019                   | 0.084 | 0.018                   | 0.283             | 0.078      | 0.403      | 0.211             | 0.306      | 0.656                  | 0.961              | 0.633      |
| Non-2-enal           | Pearson Correlation | <b>0.801**</b>      | -<br><b>0.752</b><br>** | -<br>0.116         | -<br><b>0.687</b><br>** | 0.074 | -<br><b>0.549</b><br>** | 0.056             | 0.174      | -<br>0.099 | 0.109             | -<br>0.043 | -<br>0.031             | -<br>0.150         | -<br>0.145 |
|                      | Sig. (2-tailed)     | <0.001              | <0.001                  | 0.499              | <0.001                  | 0.670 | <0.001                  | 0.747             | 0.310      | 0.567      | 0.526             | 0.805      | 0.859                  | 0.383              | 0.400      |
| Octanoic acid        | Pearson Correlation | -0.186              | <b>0.443</b><br>**      | <b>0.439</b><br>** | <b>0.454</b><br>**      | 0.136 | 0.252                   | <b>0.421</b><br>* | -<br>0.130 | 0.154      | -<br>0.016        | 0.060      | 0.114                  | -<br>0.309         | -<br>0.076 |
|                      | Sig. (2-tailed)     | 0.277               | 0.007                   | 0.007              | 0.005                   | 0.428 | 0.138                   | 0.011             | 0.448      | 0.370      | 0.928             | 0.730      | 0.510                  | 0.067              | 0.660      |
| Decanal              | Pearson Correlation | 0.040               | 0.083                   | 0.091              | <b>0.405</b><br>*       | 0.225 | <b>0.494</b><br>**      | 0.126             | -<br>0.214 | -<br>0.165 | <b>0.335</b><br>* | 0.136      | -<br>0.210             | 0.087              | 0.010      |
|                      | Sig. (2-tailed)     | 0.818               | 0.629                   | 0.597              | 0.014                   | 0.187 | 0.002                   | 0.465             | 0.209      | 0.336      | 0.046             | 0.430      | 0.219                  | 0.615              | 0.955      |
| Nona-2,4-dienal      | Pearson Correlation | -<br><b>0.434**</b> | <b>0.364</b><br>*       | -<br>0.134         | 0.208                   | 0.244 | 0.252                   | -<br>0.134        | 0.141      | 0.229      | 0.213             | -<br>0.078 | -<br>0.272             | <b>0.697</b><br>** | -<br>0.134 |

|                                                   |                     |                 |               |               |                |                 |                |                |                |                |                |                 |                 |        |                |
|---------------------------------------------------|---------------------|-----------------|---------------|---------------|----------------|-----------------|----------------|----------------|----------------|----------------|----------------|-----------------|-----------------|--------|----------------|
|                                                   | Sig. (2-tailed)     | 0.008           | 0.029         | 0.436         | 0.224          | 0.151           | 0.137          | 0.436          | 0.413          | 0.180          | 0.213          | 0.652           | 0.108           | <0.001 | 0.435          |
| Dec-2-enal                                        | Pearson Correlation | <b>-0.367*</b>  | 0.272         | -0.167        | <b>0.337*</b>  | <b>-0.469**</b> | <b>0.339*</b>  | 0.167          | 0.228          | 0.034          | <b>0.417*</b>  | -0.121          | <b>-0.469**</b> | 0.167  | <b>0.722**</b> |
|                                                   | Sig. (2-tailed)     | 0.028           | 0.109         | 0.330         | 0.044          | 0.004           | 0.043          | 0.330          | 0.182          | 0.842          | 0.011          | 0.483           | 0.004           | 0.330  | <0.001         |
| Nonanoic acid                                     | Pearson Correlation | -0.098          | 0.158         | 0.022         | <b>0.432**</b> | 0.132           | <b>0.600**</b> | 0.007          | -0.236         | -0.232         | 0.327          | 0.159           | -0.192          | -0.024 | 0.196          |
|                                                   | Sig. (2-tailed)     | 0.571           | 0.359         | 0.901         | 0.009          | 0.442           | <0.001         | 0.969          | 0.166          | 0.173          | 0.051          | 0.353           | 0.263           | 0.889  | 0.252          |
| Anethole                                          | Pearson Correlation | 0.038           | 0.061         | -0.238        | <b>0.542**</b> | 0.088           | -0.094         | <b>0.625**</b> | -0.058         | 0.157          | <b>0.592**</b> | -0.258          | <b>-0.379*</b>  | -0.028 | -0.095         |
|                                                   | Sig. (2-tailed)     | 0.825           | 0.722         | 0.162         | <0.001         | 0.609           | 0.586          | <0.001         | 0.738          | 0.362          | <0.001         | 0.128           | 0.022           | 0.162  | 0.582          |
| Tridecane                                         | Pearson Correlation | -0.070          | 0.270         | -0.131        | <b>0.513**</b> | 0.091           | 0.020          | <b>0.812**</b> | <b>0.511**</b> | <b>0.649**</b> | <b>0.545**</b> | <b>-0.594**</b> | <b>-0.611**</b> | -0.131 | -0.132         |
|                                                   | Sig. (2-tailed)     | 0.683           | 0.112         | 0.445         | 0.001          | 0.598           | 0.906          | <0.001         | 0.001          | <0.001         | <0.001         | <0.001          | <0.001          | 0.445  | 0.444          |
| Undecanal                                         | Pearson Correlation | <b>-0.507**</b> | <b>0.358*</b> | -0.146        | 0.014          | -0.051          | -0.087         | -0.146         | 0.018          | 0.218          | -0.315         | 0.032           | <b>0.361*</b>   | 0.178  | -0.081         |
|                                                   | Sig. (2-tailed)     | 0.002           | 0.032         | 0.397         | 0.935          | 0.770           | 0.616          | 0.397          | 0.918          | 0.201          | 0.061          | 0.851           | 0.031           | 0.298  | 0.640          |
| 2-methylpropanoic acid 2,2-dimethyl-1-(2-hydroxy- | Pearson Correlation | 0.035           | 0.159         | <b>0.404*</b> | <b>0.357*</b>  | 0.078           | 0.228          | 0.111          | <b>0.372*</b>  | -0.212         | 0.037          | 0.298           | 0.062           | -0.072 | 0.027          |
|                                                   | Sig. (2-tailed)     | 0.841           | 0.353         | 0.015         | 0.033          | 0.653           | 0.181          | 0.519          | 0.025          | 0.215          | 0.832          | 0.078           | 0.718           | 0.678  | 0.878          |

|                                                     |                     |                |                |        |                |        |                |        |                |        |                |               |                |        |        |
|-----------------------------------------------------|---------------------|----------------|----------------|--------|----------------|--------|----------------|--------|----------------|--------|----------------|---------------|----------------|--------|--------|
| 1-methylethyl)propyl ester                          |                     |                |                |        |                |        |                |        |                |        |                |               |                |        |        |
| Eugenol                                             | Pearson Correlation | -0.041         | 0.048          | -0.216 | <b>0.507**</b> | 0.154  | 0.198          | 0.289  | -0.286         | -0.137 | <b>0.522**</b> | -0.022        | -0.235         | -0.216 | -0.075 |
|                                                     | Sig. (2-tailed)     | 0.814          | 0.779          | 0.207  | 0.002          | 0.370  | 0.247          | 0.087  | 0.091          | 0.427  | 0.001          | 0.899         | 0.167          | 0.207  | 0.662  |
| 2-methylpropanoic acid 2-ethyl-3-hydroxyhexyl ester | Pearson Correlation | -0.321         | <b>0.371*</b>  | 0.183  | <b>0.487**</b> | 0.033  | 0.179          | 0.030  | <b>0.514**</b> | -0.187 | -0.053         | <b>0.364*</b> | 0.322          | -0.115 | 0.004  |
|                                                     | Sig. (2-tailed)     | 0.056          | 0.026          | 0.286  | 0.003          | 0.848  | 0.296          | 0.863  | 0.001          | 0.274  | 0.757          | 0.029         | 0.055          | 0.504  | 0.982  |
| $\beta$ -Damascenone                                | Pearson Correlation | -0.480**       | <b>0.404*</b>  | 0.005  | 0.137          | -0.044 | -0.145         | -0.017 | -0.095         | 0.214  | <b>0.374*</b>  | 0.095         | <b>0.479**</b> | -0.081 | -0.130 |
|                                                     | Sig. (2-tailed)     | 0.003          | 0.015          | 0.975  | 0.425          | 0.797  | 0.398          | 0.924  | 0.581          | 0.211  | 0.025          | 0.581         | 0.003          | 0.638  | 0.448  |
| 1-Tetradecene                                       | Pearson Correlation | <b>0.558**</b> | <b>0.622**</b> | -0.174 | <b>0.605**</b> | 0.151  | <b>0.548**</b> | 0.174  | 0.042          | 0.103  | -0.069         | 0.065         | 0.144          | 0.174  | 0.174  |
|                                                     | Sig. (2-tailed)     | <0.001         | <0.001         | 0.310  | <0.001         | 0.381  | <0.001         | 0.311  | 0.808          | 0.550  | 0.688          | 0.706         | 0.401          | 0.310  | 0.310  |
| Tetradecane                                         | Pearson Correlation | -0.698**       | <b>0.611**</b> | 0.044  | <b>0.469**</b> | 0.037  | -0.046         | 0.060  | <b>0.375*</b>  | 0.087  | -0.214         | 0.224         | <b>0.422*</b>  | -0.030 | -0.175 |
|                                                     | Sig. (2-tailed)     | <0.001         | <0.001         | 0.797  | 0.004          | 0.828  | 0.790          | 0.726  | 0.024          | 0.614  | 0.210          | 0.190         | 0.010          | 0.864  | 0.307  |
| Dodecanal                                           | Pearson Correlation | -0.281         | 0.209          | -0.159 | 0.157          | 0.229  | <b>0.344*</b>  | -0.023 | -0.115         | 0.073  | -0.144         | 0.127         | <b>0.336*</b>  | -0.016 | -0.124 |

|                                                               |                     |                     |                    |                |                    |            |            |                |                     |                    |                |                     |                     |                |                |
|---------------------------------------------------------------|---------------------|---------------------|--------------------|----------------|--------------------|------------|------------|----------------|---------------------|--------------------|----------------|---------------------|---------------------|----------------|----------------|
|                                                               | Sig. (2-tailed)     | 0.097               | 0.222              | 0.356          | 0.360              | 0.178      | 0.040      | 0.89<br>4      | 0.503               | 0.67<br>3          | 0.402          | 0.461               | 0.045               | 0.92<br>8      | 0.47<br>2      |
| 3-(2,2,6-Trimethyl-7-oxabicyclo[4.1.0]heptan-1-yl)prop-2-enal | Pearson Correlation | -<br><b>0.577**</b> | <b>0.493**</b>     | -<br>0.042     | 0.304              | 0.020      | 0.030      | -<br>0.06<br>2 | -<br>0.244          | 0.11<br>9          | -<br>0.311     | 0.184               | <b>0.474**</b>      | -<br>0.03<br>8 | -<br>0.11<br>1 |
|                                                               | Sig. (2-tailed)     | <0.001              | 0.002              | 0.807          | 0.072              | 0.906      | 0.862      | 0.72<br>0      | 0.152               | 0.49<br>1          | 0.065          | 0.281               | 0.003               | 0.82<br>4      | 0.52<br>1      |
| Tridecanal                                                    | Pearson Correlation | <b>0.407*</b>       | -<br><b>0.390*</b> | -<br>0.091     | -<br><b>0.413*</b> | -<br>0.153 | -<br>0.173 | -<br>0.09<br>1 | 0.049               | -<br>0.19<br>4     | -<br>0.094     | 0.056               | 0.112               | -<br>0.09<br>1 | -<br>0.09<br>1 |
|                                                               | Sig. (2-tailed)     | 0.014               | 0.019              | 0.599          | 0.012              | 0.372      | 0.313      | 0.59<br>9      | 0.777               | 0.25<br>7          | 0.584          | 0.745               | 0.517               | 0.59<br>9      | 0.59<br>8      |
| ((Butoxy methylethoxy)methylethoxy)-propanol                  | Pearson Correlation | <b>-0.398*</b>      | <b>0.344*</b>      | -<br>0.117     | <b>0.392*</b>      | 0.237      | 0.139      | -<br>0.03<br>7 | -<br><b>0.476**</b> | -<br>0.10<br>3     | -<br>0.057     | 0.282               | <b>0.349*</b>       | 0.01<br>0      | -<br>0.20<br>1 |
|                                                               | Sig. (2-tailed)     | 0.016               | 0.040              | 0.498          | 0.018              | 0.164      | 0.420      | 0.83<br>0      | 0.003               | 0.54<br>9          | 0.742          | 0.095               | 0.037               | 0.95<br>2      | 0.24<br>0      |
| Hexadecane                                                    | Pearson Correlation | -<br><b>0.554**</b> | <b>0.611**</b>     | 0.140          | 0.190              | -<br>0.176 | 0.038      | 0.15<br>7      | 0.244               | <b>0.449**</b>     | -<br>0.292     | -<br>0.106          | 0.182               | 0.21<br>1      | 0.10<br>0      |
|                                                               | Sig. (2-tailed)     | <0.001              | <0.00<br>1         | 0.416          | 0.267              | 0.304      | 0.828      | 0.36<br>1      | 0.152               | 0.00<br>6          | 0.084          | 0.537               | 0.289               | 0.21<br>7      | 0.56<br>1      |
| Tetradecanal                                                  | Pearson Correlation | 0.283               | -<br>0.256         | <b>0.741**</b> | -<br>0.278         | -<br>0.117 | -<br>0.137 | -<br>0.28<br>6 | -<br>0.251          | -<br><b>0.388*</b> | -<br>0.169     | <b>0.359*</b>       | 0.235               | -<br>0.28<br>6 | -<br>0.00<br>5 |
|                                                               | Sig. (2-tailed)     | 0.095               | 0.132              | <0.00<br>1     | 0.101              | 0.498      | 0.427      | 0.09<br>1      | 0.139               | 0.01<br>9          | 0.323          | 0.032               | 0.168               | 0.09<br>1      | 0.97<br>8      |
| Tridecanedial                                                 | Pearson Correlation | 0.096               | -<br>0.015         | -<br>0.204     | 0.250              | 0.089      | -<br>0.113 | <b>0.521**</b> | <b>0.457**</b>      | <b>0.459**</b>     | <b>0.519**</b> | -<br><b>0.469**</b> | -<br><b>0.514**</b> | -<br>0.20<br>4 | -<br>0.20<br>4 |
|                                                               | Sig. (2-tailed)     | 0.579               | 0.932              | 0.233          | 0.142              | 0.606      | 0.512      | 0.00<br>1      | 0.005               | 0.00<br>5          | 0.001          | 0.004               | 0.001               | 0.23<br>3      | 0.23<br>2      |

|                               |                     |                |       |                |               |       |       |       |               |       |                |               |               |       |       |
|-------------------------------|---------------------|----------------|-------|----------------|---------------|-------|-------|-------|---------------|-------|----------------|---------------|---------------|-------|-------|
| Pentadecanal                  | Pearson Correlation | 0.078          | 0.043 | <b>0.874**</b> | -             | -     | -     | -     | -             | -     | -              | 0.304         | 0.245         | -     | -     |
|                               | Sig. (2-tailed)     | 0.652          | 0.803 | <0.001         | 0.102         | 0.090 | 0.104 | 0.162 | 0.215         | 0.205 | 0.291          | 0.071         | 0.149         | 0.217 | 0.061 |
| cis,cis-7,10-Hexadecadienal   | Pearson Correlation | -0.122         | 0.254 | <b>0.852**</b> | 0.045         | -     | -     | -     | -             | -     | -              | 0.299         | 0.201         | -     | -     |
|                               | Sig. (2-tailed)     | 0.480          | 0.136 | <0.001         | 0.794         | 0.929 | 0.684 | 0.397 | 0.104         | 0.313 | 0.229          | 0.076         | 0.241         | 0.397 | 0.396 |
| 7-Hexadecenal                 | Pearson Correlation | -0.015         | 0.219 | <b>1.000**</b> | -             | -     | -     | -     | -             | -     | -              | <b>0.372*</b> | <b>0.394*</b> | -     | -     |
|                               | Sig. (2-tailed)     | 0.931          | 0.199 | <0.001         | 0.060         | 0.038 | 0.096 | 0.090 | <b>0.338*</b> | 0.193 | <b>0.464**</b> | 0.025         | 0.018         | 0.090 | 0.091 |
| 11-Hexadecyn-1-ol             | Pearson Correlation | 0.146          | -     | <b>0.818**</b> | -             | -     | -     | -     | -             | -     | -              | 0.326         | <b>0.332*</b> | -     | -     |
|                               | Sig. (2-tailed)     | 0.395          | 0.037 | <0.001         | 0.203         | 0.091 | 0.025 | 0.216 | 0.136         | 0.175 | <b>0.433**</b> | 0.052         | 0.048         | 0.098 | 0.042 |
| 14-methyl-8-Hexadecenal       | Pearson Correlation | 0.168          | -     | <b>0.836**</b> | -             | -     | -     | -     | -             | -     | -              | 0.306         | 0.276         | -     | -     |
|                               | Sig. (2-tailed)     | 0.327          | 0.073 | <0.001         | 0.167         | 0.133 | 0.110 | 0.178 | 0.169         | 0.206 | <b>0.334*</b>  | 0.069         | 0.103         | 0.231 | 0.004 |
| Methyl hexadecanoate          | Pearson Correlation | <b>-0.355*</b> | 0.241 | -              | <b>0.339*</b> | 0.090 | 0.094 | -     | -             | -     | -              | -             | -             | -     | -     |
|                               | Sig. (2-tailed)     | 0.034          | 0.157 | 0.091          | 0.043         | 0.603 | 0.586 | 0.091 | 0.047         | 0.071 | <b>0.456**</b> | 0.107         | <b>0.354*</b> | 0.091 | 0.091 |
| Hexadecanoic acid ethyl ester | Pearson Correlation | -0.187         | 0.327 | <b>0.806**</b> | 0.322         | -     | 0.186 | -     | -             | -     | -              | 0.290         | 0.112         | -     | -     |
|                               | Sig. (2-tailed)     | 0.034          | 0.157 | 0.091          | 0.043         | 0.603 | 0.586 | 0.091 | 0.047         | 0.071 | <b>0.456**</b> | 0.107         | <b>0.354*</b> | 0.091 | 0.091 |

|                 |                     |        |                   |                    |       |            |       |                |            |                |       |       |            |                |           |
|-----------------|---------------------|--------|-------------------|--------------------|-------|------------|-------|----------------|------------|----------------|-------|-------|------------|----------------|-----------|
|                 | Sig. (2-tailed)     | 0.275  | 0.051             | <0.00<br>1         | 0.056 | 0.928      | 0.277 | 0.85<br>1      | 0.103      | 0.49<br>6      | 0.492 | 0.086 | 0.517      | 0.72<br>0      | 0.98<br>7 |
| Ethyl<br>Oleate | Pearson Correlation | -0.300 | <b>0.336</b><br>* | <b>0.672</b><br>** | 0.241 | -<br>0.199 | 0.007 | -<br>0.16<br>6 | -<br>0.193 | -<br>0.15<br>5 | 0.046 | 0.189 | -<br>0.039 | -<br>0.16<br>6 | 0.11<br>3 |
|                 | Sig. (2-tailed)     | 0.075  | 0.045             | <0.00<br>1         | 0.156 | 0.245      | 0.969 | 0.33<br>2      | 0.258      | 0.36<br>6      | 0.790 | 0.269 | 0.823      | 0.33<br>2      | 0.51<br>1 |

LAB – lactic acid bacteria; TRIP – tryptamine; PHE – phenylethylamine; PUT – putrescine; CAD – cadaverine; HIS – histamine; TYR – tyramine; SPRMD – spermidine; SPRM – spermine; C14:0 - tetradecanoic acid; C16:0 - palmitic acid; C18:0 - stearic acid; C18:1 - 9-octadecenoic acid; C18:2 - linoleic acid; C18:3  $\alpha$  -  $\alpha$ -linolenic acid; C20:0 - eicosanoic acid; C20:1 - cis-11-eicosenoic acid. \*\* Correlation is significant at the 0.01 level (2-tailed). \* Correlation is significant at the 0.05 level (2-tailed). In **Bold** letters are marked significant values.

**Table S11.** Pearson correlations between volatiles and free amino acids (FAA) and  $\gamma$ -aminobutyric acid (GABA).

|                  |                        | Arg<br>inin<br>e    | Glut<br>ami<br>ne | Aspa<br>ragin<br>e | Glu<br>tam<br>ic<br>acid | Ser<br>ine    | As<br>par<br>tic<br>aci<br>d | Thre<br>onin<br>e   | Gl<br>yci<br>ne    | Ala<br>nin<br>e    | G<br>AB<br>A  | Pro<br>lin<br>e    | Val<br>ine         | Meth<br>ionin<br>e | Pheny<br>lalani<br>ne | Leucine/<br>Isoleuci<br>ne | Lys<br>ine         | His<br>tidi<br>ne |
|------------------|------------------------|---------------------|-------------------|--------------------|--------------------------|---------------|------------------------------|---------------------|--------------------|--------------------|---------------|--------------------|--------------------|--------------------|-----------------------|----------------------------|--------------------|-------------------|
| Hexanal          | Pearson<br>Correlation | <b>0.562**</b>      | <b>0.511**</b>    | 0.077              | -<br><b>0.684**</b>      | 0.308         | -<br><b>0.750**</b>          | -<br><b>0.368*</b>  | -<br>0.246         | -<br>0.305         | 0.178         | -<br>0.277         | -<br><b>0.453*</b> | -<br><b>0.379*</b> | -<br><b>0.551*</b>    | <b>-0.559**</b>            | -<br><b>0.339*</b> | 0.109             |
|                  | Sig. (2-tailed)        | <0.001              | 0.001             | 0.656              | <0.001                   | 0.067         | <0.001                       | 0.027               | 0.148              | 0.070              | 0.299         | 0.102              | 0.006              | 0.022              | <0.001                | <0.001                     | 0.043              | 0.525             |
| 2-Hexenal        | Pearson<br>Correlation | <b>0.534**</b>      | 0.216             | 0.084              | -<br><b>0.719**</b>      | -<br>0.007    | -<br><b>0.604*</b>           | -<br><b>0.565**</b> | -<br><b>0.480*</b> | -<br><b>0.599*</b> | -<br>0.206    | -<br><b>0.499*</b> | -<br><b>0.585*</b> | -<br>0.211         | -<br><b>0.685*</b>    | <b>-0.593**</b>            | -<br><b>0.507*</b> | -<br>0.210        |
|                  | Sig. (2-tailed)        | <0.001              | 0.206             | 0.624              | <0.001                   | 0.969         | <0.001                       | <0.001              | 0.003              | <0.001             | 0.228         | 0.002              | <0.001             | 0.217              | <0.001                | <0.001                     | 0.002              | 0.219             |
| 1-Hexanol        | Pearson<br>Correlation | 0.157               | <b>0.530**</b>    | 0.074              | -<br>0.036               | <b>0.611*</b> | -<br>0.226                   | 0.235               | <b>0.338*</b>      | 0.273              | <b>0.338*</b> | <b>0.370*</b>      | 0.164              | -<br>0.043         | 0.105                 | 0.021                      | 0.233              | <b>0.402*</b>     |
|                  | Sig. (2-tailed)        | 0.360               | <0.001            | 0.670              | 0.833                    | <0.001        | 0.185                        | 0.167               | 0.044              | 0.107              | 0.044         | 0.026              | 0.340              | 0.802              | 0.544                 | 0.905                      | 0.172              | 0.015             |
| Hept-2-enal      | Pearson<br>Correlation | -<br>0.321          | 0.037             | -<br>0.309         | <b>0.375*</b>            | <b>0.334*</b> | 0.061                        | <b>0.473**</b>      | <b>0.532*</b>      | <b>0.492*</b>      | <b>0.577*</b> | <b>0.373*</b>      | <b>0.468*</b>      | -<br>0.008         | <b>0.364*</b>         | <b>0.366*</b>              | 0.299              | 0.079             |
|                  | Sig. (2-tailed)        | 0.056               | 0.832             | 0.066              | 0.024                    | 0.047         | 0.723                        | 0.004               | <0.001             | 0.002              | <0.001        | 0.025              | 0.004              | 0.962              | 0.029                 | 0.028                      | 0.077              | 0.648             |
| Benzald<br>ehyde | Pearson<br>Correlation | -<br><b>0.446**</b> | 0.167             | 0.085              | <b>0.590**</b>           | <b>0.756*</b> | 0.327                        | <b>0.860**</b>      | <b>0.740*</b>      | <b>0.643*</b>      | <b>0.476*</b> | <b>0.894*</b>      | <b>0.883*</b>      | 0.268              | <b>0.824*</b>         | <b>0.813**</b>             | <b>0.834*</b>      | 0.209             |

|                                  |                        |                                |                |                               |                           |                               |                          |                           |                               |                               |                               |                               |                               |                   |                    |                |                               |                |
|----------------------------------|------------------------|--------------------------------|----------------|-------------------------------|---------------------------|-------------------------------|--------------------------|---------------------------|-------------------------------|-------------------------------|-------------------------------|-------------------------------|-------------------------------|-------------------|--------------------|----------------|-------------------------------|----------------|
|                                  | Sig. (2-tailed)        | 0.00<br>6                      | 0.33<br>0      | 0.624                         | <0.0<br>01                | <0.<br>001                    | 0.0<br>51                | <0.0<br>01                | <0.<br>001                    | <0.<br>001                    | 0.0<br>03                     | <0.<br>001                    | <0.<br>001                    | 0.113             | <0.001             | <0.001         | <0.<br>001                    | 0.22<br>0      |
| Vinyl<br>amyl<br>carbinol        | Pearson<br>Correlation | -<br>0.32<br>4                 | 0.23<br>5      | 0.240                         | <b>0.35</b><br><b>5*</b>  | <b>0.5</b><br><b>66*</b><br>* | 0.2<br>30                | <b>0.62</b><br><b>1**</b> | <b>0.4</b><br><b>03*</b>      | <b>0.4</b><br><b>14*</b>      | <b>0.3</b><br><b>67*</b>      | <b>0.6</b><br><b>86*</b><br>* | <b>0.5</b><br><b>94*</b><br>* | -<br>0.064        | <b>0.629*</b><br>* | <b>0.547**</b> | <b>0.6</b><br><b>80*</b><br>* | 0.23<br>8      |
|                                  | Sig. (2-tailed)        | 0.05<br>4                      | 0.16<br>8      | 0.158                         | 0.03<br>4                 | <0.<br>001                    | 0.1<br>77                | <0.0<br>01                | 0.0<br>15                     | 0.0<br>12                     | 0.0<br>28                     | <0.<br>001                    | <0.<br>001                    | 0.711             | <0.001             | <0.001         | <0.<br>001                    | 0.16<br>2      |
| Hexanoi<br>c acid                | Pearson<br>Correlation | -<br>0.18<br>5                 | -<br>0.15<br>6 | <b>-</b><br><b>0.371</b><br>* | 0.24<br>5                 | 0.0<br>22                     | 0.0<br>51                | 0.19<br>3                 | 0.3<br>13                     | 0.2<br>89                     | 0.2<br>98                     | 0.2<br>47                     | 0.2<br>28                     | 0.053             | 0.239              | 0.209          | 0.1<br>47                     | 0.08<br>8      |
|                                  | Sig. (2-tailed)        | 0.28<br>0                      | 0.36<br>4      | 0.026                         | 0.14<br>9                 | 0.8<br>99                     | 0.7<br>67                | 0.25<br>8                 | 0.0<br>63                     | 0.0<br>87                     | 0.0<br>78                     | 0.1<br>46                     | 0.1<br>81                     | 0.758             | 0.161              | 0.222          | 0.3<br>91                     | 0.60<br>8      |
| Acetic<br>acid<br>hexyl<br>ester | Pearson<br>Correlation | -<br><b>0.37</b><br><b>3*</b>  | 0.18<br>7      | -<br>0.083                    | <b>0.54</b><br><b>1**</b> | <b>0.7</b><br><b>27*</b><br>* | 0.1<br>93                | <b>0.80</b><br><b>3**</b> | <b>0.7</b><br><b>96*</b><br>* | <b>0.6</b><br><b>88*</b><br>* | <b>0.6</b><br><b>12*</b><br>* | <b>0.8</b><br><b>07*</b><br>* | <b>0.7</b><br><b>99*</b><br>* | 0.242             | <b>0.700*</b><br>* | <b>0.702**</b> | <b>0.7</b><br><b>22*</b><br>* | 0.23<br>8      |
|                                  | Sig. (2-tailed)        | 0.02<br>5                      | 0.27<br>5      | 0.632                         | <0.0<br>01                | <0.<br>001                    | 0.2<br>58                | <0.0<br>01                | <0.<br>001                    | <0.<br>001                    | <0.<br>001                    | <0.<br>001                    | <0.<br>001                    | 0.155             | <0.001             | <0.001         | <0.<br>001                    | 0.16<br>1      |
| Oct-3-<br>en-2-one               | Pearson<br>Correlation | -<br><b>0.40</b><br><b>8*</b>  | 0.08<br>0      | 0.168                         | <b>0.54</b><br><b>4**</b> | <b>0.6</b><br><b>58*</b><br>* | <b>0.3</b><br><b>57*</b> | <b>0.76</b><br><b>3**</b> | <b>0.6</b><br><b>45*</b><br>* | <b>0.5</b><br><b>17*</b><br>* | 0.2<br>28                     | <b>0.8</b><br><b>02*</b><br>* | <b>0.7</b><br><b>89*</b><br>* | <b>0.370</b><br>* | <b>0.705*</b><br>* | <b>0.737**</b> | <b>0.7</b><br><b>24*</b><br>* | 0.11<br>0      |
|                                  | Sig. (2-tailed)        | 0.01<br>3                      | 0.64<br>4      | 0.327                         | <0.0<br>01                | <0.<br>001                    | 0.0<br>32                | <0.0<br>01                | <0.<br>001                    | 0.0<br>01                     | 0.1<br>80                     | <0.<br>001                    | <0.<br>001                    | 0.026             | <0.001             | <0.001         | <0.<br>001                    | 0.52<br>2      |
| Phenyla<br>cetaldeh<br>yde       | Pearson<br>Correlation | -<br><b>0.46</b><br><b>1**</b> | 0.07<br>3      | 0.148                         | <b>0.47</b><br><b>6**</b> | <b>0.4</b><br><b>38*</b><br>* | <b>0.3</b><br><b>83*</b> | <b>0.66</b><br><b>3**</b> | <b>0.5</b><br><b>59*</b><br>* | <b>0.4</b><br><b>62*</b><br>* | <b>0.4</b><br><b>33*</b><br>* | <b>0.5</b><br><b>65*</b><br>* | <b>0.6</b><br><b>82*</b><br>* | 0.123             | <b>0.569*</b><br>* | <b>0.591**</b> | <b>0.5</b><br><b>10*</b><br>* | -<br>0.02<br>5 |
|                                  | Sig. (2-tailed)        | 0.00<br>5                      | 0.67<br>4      | 0.388                         | 0.00<br>3                 | 0.0<br>07                     | 0.0<br>21                | <0.0<br>01                | <0.<br>001                    | 0.0<br>05                     | 0.0<br>08                     | <0.<br>001                    | <0.<br>001                    | 0.474             | <0.001             | <0.001         | 0.0<br>01                     | 0.88<br>5      |
| Oct-2-<br>enal                   | Pearson<br>Correlation | -<br><b>0.46</b><br><b>9**</b> | 0.13<br>8      | -<br>0.082                    | <b>0.42</b><br><b>8**</b> | <b>0.4</b><br><b>51*</b><br>* | 0.2<br>19                | <b>0.58</b><br><b>4**</b> | <b>0.4</b><br><b>30*</b><br>* | <b>0.4</b><br><b>50*</b><br>* | <b>0.4</b><br><b>93*</b><br>* | <b>0.5</b><br><b>15*</b><br>* | <b>0.5</b><br><b>93*</b><br>* | -<br>0.179        | <b>0.538*</b><br>* | <b>0.487**</b> | <b>0.4</b><br><b>62*</b><br>* | 0.08<br>0      |
|                                  | Sig. (2-tailed)        | 0.00<br>4                      | 0.42<br>3      | 0.634                         | 0.00<br>9                 | 0.0<br>06                     | 0.1<br>99                | <0.0<br>01                | 0.0<br>09                     | 0.0<br>06                     | 0.0<br>02                     | 0.0<br>01                     | <0.<br>001                    | 0.295             | <0.001             | 0.003          | 0.0<br>05                     | 0.64<br>2      |

|                        |                     |                     |                     |                |                     |                    |                |                     |                    |                    |               |               |               |                     |                    |                 |                    |               |
|------------------------|---------------------|---------------------|---------------------|----------------|---------------------|--------------------|----------------|---------------------|--------------------|--------------------|---------------|---------------|---------------|---------------------|--------------------|-----------------|--------------------|---------------|
| Octahydro-2,3'-bifuran | Pearson Correlation | -<br>0.217          | 0.228               | 0.080          | 0.130               | <b>0.348*</b>      | -<br>0.052     | <b>0.353*</b>       | 0.165              | 0.278              | <b>0.390*</b> | <b>0.399*</b> | 0.244         | -<br><b>0.471**</b> | 0.283              | 0.161           | <b>0.368*</b>      | 0.246         |
|                        | Sig. (2-tailed)     | 0.204               | 0.182               | 0.642          | 0.452               | 0.037              | 0.763          | 0.035               | 0.336              | 0.101              | 0.019         | 0.016         | 0.151         | 0.004               | 0.094              | 0.348           | 0.027              | 0.148         |
| Nonanal                | Pearson Correlation | -<br><b>0.488**</b> | -<br><b>0.448**</b> | -<br>0.166     | <b>0.526**</b>      | -<br><b>0.368*</b> | <b>0.590**</b> | 0.236               | 0.151              | 0.166              | -<br>0.070    | 0.204         | 0.257         | 0.154               | <b>0.354*</b>      | <b>0.372*</b>   | 0.279              | -<br>0.119    |
|                        | Sig. (2-tailed)     | 0.003               | 0.006               | 0.332          | <0.001              | 0.027              | <0.001         | 0.165               | 0.379              | 0.333              | 0.684         | 0.233         | 0.130         | 0.370               | 0.034              | 0.025           | 0.100              | 0.491         |
| Phenethyl alcohol      | Pearson Correlation | -<br><b>0.571**</b> | -<br>0.124          | 0.245          | <b>0.719**</b>      | 0.251              | <b>0.721**</b> | <b>0.743**</b>      | <b>0.596*</b>      | <b>0.447*</b>      | 0.164         | <b>0.626*</b> | <b>0.720*</b> | <b>0.449**</b>      | <b>0.660*</b>      | <b>0.767**</b>  | <b>0.734*</b>      | -<br>0.073    |
|                        | Sig. (2-tailed)     | <0.001              | 0.472               | 0.150          | <0.001              | 0.140              | <0.001         | <0.001              | <0.001             | 0.006              | 0.339         | <0.001        | <0.001        | 0.006               | <0.001             | <0.001          | <0.001             | 0.674         |
| 2-ethylhexanoic acid   | Pearson Correlation | 0.085               | 0.151               | <b>0.409*</b>  | 0.052               | -<br>0.037         | 0.124          | 0.152               | 0.209              | 0.316              | 0.247         | 0.045         | 0.064         | 0.227               | 0.083              | 0.051           | 0.173              | 0.272         |
|                        | Sig. (2-tailed)     | 0.622               | 0.380               | 0.013          | 0.762               | 0.832              | 0.471          | 0.377               | 0.221              | 0.061              | 0.147         | 0.796         | 0.710         | 0.183               | 0.630              | 0.766           | 0.313              | 0.108         |
| Non-2-enal             | Pearson Correlation | <b>0.629**</b>      | <b>0.401*</b>       | 0.175          | -<br><b>0.795**</b> | 0.126              | <b>0.745*</b>  | -<br><b>0.512**</b> | -<br><b>0.370*</b> | -<br><b>0.423*</b> | 0.064         | <b>0.464*</b> | <b>0.550*</b> | -<br>0.287          | -<br><b>0.655*</b> | <b>-0.635**</b> | -<br><b>0.501*</b> | -<br>0.015    |
|                        | Sig. (2-tailed)     | <0.001              | 0.015               | 0.308          | <0.001              | 0.462              | <0.001         | 0.001               | 0.026              | 0.010              | 0.712         | 0.004         | <0.001        | 0.089               | <0.001             | <0.001          | 0.002              | 0.931         |
| Octanoic acid          | Pearson Correlation | -<br>0.202          | -<br><b>0.356*</b>  | 0.084          | 0.143               | <b>0.552*</b>      | 0.303          | -<br>0.071          | -<br>0.109         | 0.069              | -<br>0.037    | -<br>0.202    | -<br>0.046    | -<br>0.030          | 0.055              | 0.002           | -<br>0.120         | -<br>0.075    |
|                        | Sig. (2-tailed)     | 0.238               | 0.033               | 0.627          | 0.404               | <0.001             | 0.073          | 0.680               | 0.527              | 0.689              | 0.832         | 0.237         | 0.790         | 0.862               | 0.752              | 0.991           | 0.487              | 0.664         |
| Decanal                | Pearson Correlation | 0.101               | 0.280               | <b>0.476**</b> | 0.127               | 0.185              | 0.163          | 0.283               | <b>0.354*</b>      | <b>0.423*</b>      | 0.244         | 0.210         | 0.203         | <b>0.392*</b>       | 0.212              | 0.172           | 0.310              | <b>0.377*</b> |

|                 |                     |        |               |                |                |               |               |                |               |               |               |               |               |                |               |                |               |                |
|-----------------|---------------------|--------|---------------|----------------|----------------|---------------|---------------|----------------|---------------|---------------|---------------|---------------|---------------|----------------|---------------|----------------|---------------|----------------|
|                 | Sig. (2-tailed)     | 0.558  | 0.098         | 0.003          | 0.461          | 0.281         | 0.343         | 0.095          | 0.034         | 0.010         | 0.152         | 0.220         | 0.234         | 0.018          | 0.215         | 0.317          | 0.066         | 0.024          |
| Nona-2,4-dienal | Pearson Correlation | -0.317 | 0.056         | 0.033          | <b>0.550**</b> | <b>0.614*</b> | <b>0.373*</b> | <b>0.711**</b> | <b>0.737*</b> | <b>0.536*</b> | 0.294         | <b>0.716*</b> | <b>0.800*</b> | <b>0.634**</b> | <b>0.695*</b> | <b>0.770**</b> | <b>0.662*</b> | 0.080          |
|                 | Sig. (2-tailed)     | 0.060  | 0.746         | 0.848          | <0.001         | <0.001        | 0.025         | <0.001         | <0.001        | <0.001        | 0.082         | <0.001        | <0.001        | <0.001         | <0.001        | <0.001         | <0.001        | 0.641          |
| Dec-2-enal      | Pearson Correlation | -0.307 | 0.250         | 0.200          | 0.307          | <b>0.535*</b> | 0.156         | <b>0.576**</b> | <b>0.359*</b> | <b>0.400*</b> | <b>0.410*</b> | <b>0.640*</b> | <b>0.524*</b> | -0.192         | <b>0.564*</b> | <b>0.464**</b> | <b>0.625*</b> | 0.258          |
|                 | Sig. (2-tailed)     | 0.069  | 0.142         | 0.243          | 0.069          | <0.001        | 0.364         | <0.001         | 0.032         | 0.016         | 0.013         | <0.001        | 0.001         | 0.263          | <0.001        | 0.004          | <0.001        | 0.128          |
| Nonanoic acid   | Pearson Correlation | 0.109  | <b>0.345*</b> | <b>0.526**</b> | 0.113          | 0.217         | 0.117         | <b>0.352*</b>  | <b>0.407*</b> | <b>0.547*</b> | <b>0.424*</b> | 0.318         | 0.226         | 0.260          | 0.281         | 0.173          | <b>0.404*</b> | <b>0.531**</b> |
|                 | Sig. (2-tailed)     | 0.525  | 0.039         | <0.001         | 0.510          | 0.204         | 0.495         | 0.036          | 0.014         | <0.001        | 0.010         | 0.058         | 0.184         | 0.126          | 0.097         | 0.313          | 0.015         | <0.001         |
| Anethole        | Pearson Correlation | 0.069  | -0.027        | <b>0.682**</b> | -0.051         | -0.239        | 0.299         | 0.020          | 0.022         | 0.015         | 0.093         | 0.105         | 0.037         | 0.329          | -0.077        | -0.007         | 0.008         | -0.097         |
|                 | Sig. (2-tailed)     | 0.688  | 0.876         | <0.001         | 0.769          | 0.160         | 0.076         | 0.910          | 0.900         | 0.931         | 0.591         | 0.544         | 0.831         | 0.050          | 0.656         | 0.966          | 0.962         | 0.575          |
| Tridecane       | Pearson Correlation | -0.310 | -0.139        | 0.273          | 0.308          | -0.040        | <b>0.529*</b> | 0.256          | 0.168         | 0.085         | -0.077        | 0.134         | <b>0.354*</b> | 0.320          | 0.298         | <b>0.360*</b>  | 0.152         | -0.239         |
|                 | Sig. (2-tailed)     | 0.066  | 0.419         | 0.108          | 0.068          | 0.818         | <0.001        | 0.132          | 0.328         | 0.622         | 0.657         | 0.437         | 0.034         | 0.057          | 0.078         | 0.031          | 0.376         | 0.161          |
| Undecanal       | Pearson Correlation | -0.309 | -0.473**      | <b>0.393*</b>  | 0.257          | -0.286        | 0.209         | -0.001         | -0.018        | -0.077        | -0.188        | 0.049         | 0.067         | -0.038         | 0.103         | 0.135          | -0.024        | -0.243         |
|                 | Sig. (2-tailed)     | 0.066  | 0.004         | 0.018          | 0.130          | 0.091         | 0.222         | 0.995          | 0.916         | 0.653         | 0.272         | 0.775         | 0.699         | 0.826          | 0.550         | 0.432          | 0.890         | 0.154          |

|                                                       |                     |                |                |                |          |               |       |               |        |        |               |               |        |                |               |                 |         |               |
|-------------------------------------------------------|---------------------|----------------|----------------|----------------|----------|---------------|-------|---------------|--------|--------|---------------|---------------|--------|----------------|---------------|-----------------|---------|---------------|
| 2-methylpropanoic acid                                | Pearson Correlation | -0.073         | -0.057         | 0.156          | 0.090    | -0.201        | 0.158 | 0.008         | -0.046 | 0.055  | -0.044        | -0.123        | -0.039 | 0.047          | -0.013        | -0.001          | 0.028   | 0.015         |
| 2,2-dimethyl-1-(2-hydroxy-1-methyl-ethyl)propyl ester | Sig. (2-tailed)     | 0.671          | 0.742          | 0.362          | 0.600    | 0.240         | 0.357 | 0.963         | 0.791  | 0.751  | 0.799         | 0.476         | 0.823  | 0.784          | 0.942         | 0.996           | 0.871   | 0.929         |
| Eugenol                                               | Pearson Correlation | 0.206          | 0.120          | <b>0.728**</b> | -0.036   | -0.099        | 0.215 | 0.101         | 0.175  | 0.203  | 0.052         | 0.050         | 0.010  | <b>0.430**</b> | 0.037         | 0.031           | 0.166   | 0.230         |
|                                                       | Sig. (2-tailed)     | 0.227          | 0.487          | <0.001         | 0.835    | 0.566         | 0.207 | 0.558         | 0.307  | 0.234  | 0.763         | 0.770         | 0.952  | 0.009          | 0.828         | 0.859           | 0.332   | 0.176         |
| 2-methylpropanoic acid 2-ethyl-3-hydroxyhexyl ester   | Pearson Correlation | -0.157         | <b>-0.333*</b> | 0.128          | 0.161    | <b>0.496*</b> | 0.292 | -0.051        | -0.089 | 0.001  | -0.167        | -0.140        | -0.110 | 0.048          | -0.028        | -0.014          | -0.001  | 0.061         |
|                                                       | Sig. (2-tailed)     | 0.362          | 0.047          | 0.457          | 0.349    | 0.002         | 0.084 | 0.768         | 0.606  | 0.995  | 0.331         | 0.414         | 0.521  | 0.782          | 0.872         | 0.934           | 0.996   | 0.722         |
| β-Damascenone                                         | Pearson Correlation | <b>0.345*</b>  | <b>0.610**</b> | <b>0.409*</b>  | 0.226    | <b>0.599*</b> | 0.300 | -0.182        | -0.243 | -0.241 | <b>0.356*</b> | -0.180        | -0.113 | -0.132         | -0.030        | 0.004           | -0.189  | <b>0.361*</b> |
|                                                       | Sig. (2-tailed)     | 0.039          | <0.001         | 0.013          | 0.185    | <0.001        | 0.076 | 0.287         | 0.154  | 0.157  | 0.033         | 0.293         | 0.512  | 0.441          | 0.862         | 0.982           | 0.271   | 0.030         |
| 1-Tetradecene                                         | Pearson Correlation | <b>0.502**</b> | <b>0.422*</b>  | 0.045          | -0.629** | 0.111         | -0.05 | <b>0.404*</b> | -0.300 | -0.335 | -0.101        | <b>0.341*</b> | -0.04  | -0.229         | <b>0.520*</b> | <b>-0.507**</b> | -0.348* | 0.018         |

|                                                               |                     | 51*      |          |        |         |          |          |         | 55*     |          |         |         |         |          |         |         |         |         |
|---------------------------------------------------------------|---------------------|----------|----------|--------|---------|----------|----------|---------|---------|----------|---------|---------|---------|----------|---------|---------|---------|---------|
|                                                               |                     | *        |          |        |         |          |          |         | *       |          |         |         |         |          |         |         |         |         |
| Tetradecane                                                   | Sig. (2-tailed)     | 0.002    | 0.010    | 0.795  | <0.01   | 0.518    | <0.001   | 0.014   | 0.075   | 0.046    | 0.557   | 0.042   | 0.005   | 0.180    | 0.001   | 0.002   | 0.037   | 0.916   |
|                                                               | Pearson Correlation | -0.469** | -0.654** | -0.211 | 0.439** | 0.554**  | 0.562**  | 0.047   | -0.059  | -0.097   | -0.345* | -0.005  | 0.102   | 0.134    | 0.180   | 0.264   | 0.081   | -0.359* |
|                                                               | Sig. (2-tailed)     | 0.004    | <0.001   | 0.217  | 0.007   | <0.001   | <0.001   | 0.787   | 0.731   | 0.573    | 0.039   | 0.978   | 0.552   | 0.436    | 0.294   | 0.120   | 0.641   | 0.031   |
| Dodecanal                                                     | Pearson Correlation | 0.084    | -0.069   | 0.064  | 0.061   | -0.297   | 0.126    | -0.030  | 0.126   | 0.253    | 0.094   | 0.014   | -0.077  | 0.178    | 0.034   | -0.069  | -0.008  | 0.295   |
|                                                               | Sig. (2-tailed)     | 0.625    | 0.688    | 0.710  | 0.726   | 0.078    | 0.463    | 0.860   | 0.464   | 0.137    | 0.587   | 0.934   | 0.657   | 0.299    | 0.846   | 0.689   | 0.963   | 0.081   |
| 3-(2,2,6-Trimethyl-7-oxabicyclo[4.1.0]heptan-1-yl)prop-2-enal | Pearson Correlation | -0.347*  | -0.550** | -0.277 | 0.306   | 0.561**  | 0.377*   | -0.058  | 0.106   | 0.085    | 0.252   | 0.072   | 0.040   | -0.039   | 0.057   | 0.079   | 0.039   | 0.230   |
|                                                               | Sig. (2-tailed)     | 0.038    | <0.001   | 0.102  | 0.069   | <0.001   | 0.024    | 0.738   | 0.539   | 0.621    | 0.139   | 0.677   | 0.818   | 0.819    | 0.739   | 0.649   | 0.822   | 0.177   |
| Tridecanal                                                    | Pearson Correlation | 0.177    | -0.084   | -0.286 | -0.287  | -0.052   | -0.429** | -0.409* | -0.413* | -0.491** | -0.312  | -0.349* | -0.404* | -0.428** | -0.410* | -0.378* | -0.358* | -0.173  |
|                                                               | Sig. (2-tailed)     | 0.302    | 0.625    | 0.091  | 0.090   | 0.765    | 0.009    | 0.013   | 0.012   | 0.002    | 0.064   | 0.037   | 0.015   | 0.009    | 0.013   | 0.023   | 0.032   | 0.314   |
| ((Butoxy)methyl)ethoxym                                       | Pearson Correlation | -0.056   | -0.246   | 0.170  | 0.141   | -0.402** | 0.272    | 0.010   | 0.066   | 0.100    | -0.029  | -0.034  | -0.061  | 0.199    | 0.003   | 0.022   | 0.072   | 0.031   |

|                             |                     |          |          |          |         |         |        |        |        |        |        |        |       |        |        |        |        |         |
|-----------------------------|---------------------|----------|----------|----------|---------|---------|--------|--------|--------|--------|--------|--------|-------|--------|--------|--------|--------|---------|
| ethylethoxy)-propanol       | Sig. (2-tailed)     | 0.744    | 0.149    | 0.320    | 0.411   | 0.015   | 0.108  | 0.953  | 0.702  | 0.561  | 0.868  | 0.846  | 0.722 | 0.244  | 0.984  | 0.900  | 0.677  | 0.856   |
| Hexadecane                  | Pearson Correlation | -0.606** | -0.644** | -0.511** | 0.445** | -0.343* | 0.342* | 0.111  | -0.016 | -0.026 | -0.149 | 0.073  | 0.222 | -0.215 | 0.243  | 0.272  | -0.011 | -0.394* |
|                             | Sig. (2-tailed)     | <0.001   | <0.001   | 0.001    | 0.007   | 0.040   | 0.041  | 0.520  | 0.928  | 0.881  | 0.386  | 0.674  | 0.194 | 0.208  | 0.153  | 0.109  | 0.948  | 0.017   |
| Tetradecanal                | Pearson Correlation | 0.196    | -0.029   | -0.098   | -0.211  | -0.054  | -0.177 | -0.307 | -0.310 | -0.228 | 0.330* | 0.257  | 0.164 | 0.105  | -0.106 | -0.126 | 0.244  | -0.026  |
|                             | Sig. (2-tailed)     | 0.251    | 0.866    | 0.568    | 0.217   | 0.754   | 0.302  | 0.069  | 0.066  | 0.181  | 0.049  | 0.130  | 0.340 | 0.544  | 0.539  | 0.463  | 0.152  | 0.882   |
| Tridecanedial               | Pearson Correlation | -0.125   | 0.024    | 0.216    | 0.157   | 0.129   | 0.348* | 0.145  | 0.084  | -0.050 | -0.165 | 0.109  | 0.257 | 0.340* | 0.208  | 0.274  | 0.125  | -0.183  |
|                             | Sig. (2-tailed)     | 0.469    | 0.889    | 0.206    | 0.360   | 0.453   | 0.037  | 0.399  | 0.627  | 0.772  | 0.335  | 0.527  | 0.130 | 0.042  | 0.224  | 0.106  | 0.469  | 0.285   |
| Pentadecanal                | Pearson Correlation | -0.135   | -0.289   | 0.330*   | 0.061   | -0.188  | 0.063  | -0.199 | -0.300 | -0.235 | 0.382* | -0.227 | 0.017 | 0.028  | 0.037  | 0.058  | 0.190  | -0.246  |
|                             | Sig. (2-tailed)     | 0.431    | 0.087    | 0.049    | 0.723   | 0.272   | 0.716  | 0.244  | 0.075  | 0.168  | 0.021  | 0.183  | 0.920 | 0.873  | 0.829  | 0.739  | 0.266  | 0.149   |
| cis,cis-7,10-Hexadecadienal | Pearson Correlation | -0.273   | 0.416*   | -0.292   | 0.208   | -0.164  | 0.185  | -0.042 | -0.171 | -0.155 | -0.312 | -0.093 | 0.156 | 0.096  | 0.205  | 0.253  | 0.036  | -0.311  |
|                             | Sig. (2-tailed)     | 0.107    | 0.012    | 0.085    | 0.223   | 0.339   | 0.281  | 0.806  | 0.318  | 0.367  | 0.064  | 0.590  | 0.364 | 0.576  | 0.230  | 0.137  | 0.834  | 0.065   |
| 7-Hexadecenal               | Pearson Correlation | -0.214   | 0.481**  | 0.405*   | 0.069   | -0.410* | 0.046  | -0.250 | 0.343* | -0.237 | -0.329 | 0.342* | 0.097 | -0.112 | -0.046 | -0.016 | -0.298 | 0.339*  |
|                             | Sig. (2-tailed)     | 0.211    | 0.003    | 0.014    | 0.690   | 0.013   | 0.791  | 0.142  | 0.041  | 0.164  | 0.050  | 0.041  | 0.575 | 0.516  | 0.792  | 0.925  | 0.077  | 0.043   |

|                                                                                                                                                                                                                     |                        |                               |                |                         |                          |                               |                               |                           |                               |                |                               |                               |                               |                    |                    |                |                               |                |
|---------------------------------------------------------------------------------------------------------------------------------------------------------------------------------------------------------------------|------------------------|-------------------------------|----------------|-------------------------|--------------------------|-------------------------------|-------------------------------|---------------------------|-------------------------------|----------------|-------------------------------|-------------------------------|-------------------------------|--------------------|--------------------|----------------|-------------------------------|----------------|
| 11-Hexadec<br>yn-1-ol                                                                                                                                                                                               | Pearson<br>Correlation | -<br>0.12<br>2                | -<br>0.23<br>6 | -<br><b>0.490</b><br>** | 0.07<br>4                | -<br>0.1<br>73                | 0.0<br>17                     | -<br>0.24<br>4            | -<br>0.3<br>15                | -<br>0.2<br>38 | -<br><b>0.4</b><br><b>15*</b> | -<br>0.2<br>56                | -<br>0.0<br>81                | -<br>0.025         | -0.025             | -0.020         | -<br>0.2<br>45                | -<br>0.19<br>2 |
|                                                                                                                                                                                                                     | Sig. (2-tailed)        | 0.48<br>0                     | 0.16<br>6      | 0.002                   | 0.66<br>9                | 0.3<br>14                     | 0.9<br>23                     | 0.15<br>2                 | 0.0<br>61                     | 0.1<br>62      | 0.0<br>12                     | 0.1<br>31                     | 0.6<br>39                     | 0.884              | 0.883              | 0.908          | 0.1<br>50                     | 0.26<br>1      |
| 14-methyl-<br>8-Hexadec<br>enal                                                                                                                                                                                     | Pearson<br>Correlation | -<br>0.05<br>9                | -<br>0.19<br>8 | -<br><b>0.341</b><br>*  | -<br>0.00<br>9           | -<br>0.1<br>94                | 0.0<br>16                     | -<br>0.27<br>1            | -<br><b>0.3</b><br><b>49*</b> | -<br>0.2<br>58 | -<br><b>0.4</b><br><b>15*</b> | -<br>0.2<br>82                | -<br>0.1<br>08                | 0.010              | -0.049             | -0.048         | -<br>0.2<br>59                | -<br>0.18<br>8 |
|                                                                                                                                                                                                                     | Sig. (2-tailed)        | 0.73<br>2                     | 0.24<br>7      | 0.042                   | 0.96<br>1                | 0.2<br>57                     | 0.9<br>28                     | 0.11<br>0                 | 0.0<br>37                     | 0.1<br>29      | 0.0<br>12                     | 0.0<br>96                     | 0.5<br>30                     | 0.955              | 0.779              | 0.781          | 0.1<br>28                     | 0.27<br>1      |
| Methyl<br>hexadec<br>anoate                                                                                                                                                                                         | Pearson<br>Correlation | -<br>0.21<br>4                | -<br>0.07<br>6 | 0.255                   | <b>0.38</b><br><b>8*</b> | <b>0.4</b><br><b>31*</b><br>* | <b>0.4</b><br><b>31*</b><br>* | <b>0.51</b><br><b>0**</b> | <b>0.4</b><br><b>28*</b><br>* | 0.2<br>97      | 0.0<br>87                     | <b>0.5</b><br><b>51*</b><br>* | <b>0.6</b><br><b>20*</b><br>* | <b>0.543</b><br>** | <b>0.626*</b><br>* | <b>0.656**</b> | <b>0.5</b><br><b>88*</b><br>* | 0.05<br>9      |
|                                                                                                                                                                                                                     | Sig. (2-tailed)        | 0.21<br>0                     | 0.66<br>1      | 0.133                   | 0.01<br>9                | 0.0<br>09                     | 0.0<br>09                     | 0.00<br>1                 | 0.0<br>09                     | 0.0<br>78      | 0.6<br>13                     | <0.<br>001                    | <0.<br>001                    | <0.00<br>1         | <0.001             | <0.001         | <0.<br>001                    | 0.73<br>3      |
| Hexadec<br>anoic<br>acid<br>ethyl<br>ester                                                                                                                                                                          | Pearson<br>Correlation | -<br>0.31<br>1                | -<br>0.29<br>2 | -<br>0.127              | <b>0.36</b><br><b>2*</b> | -<br>0.1<br>53                | <b>0.4</b><br><b>11*</b>      | 0.10<br>8                 | -<br>0.0<br>02                | 0.0<br>74      | -<br>0.2<br>84                | 0.0<br>25                     | 0.2<br>58                     | 0.318              | 0.316              | <b>0.338*</b>  | 0.1<br>06                     | -<br>0.13<br>4 |
|                                                                                                                                                                                                                     | Sig. (2-tailed)        | 0.06<br>5                     | 0.08<br>4      | 0.462                   | 0.03<br>0                | 0.3<br>73                     | 0.0<br>13                     | 0.52<br>9                 | 0.9<br>89                     | 0.6<br>70      | 0.0<br>93                     | 0.8<br>87                     | 0.1<br>28                     | 0.059              | 0.060              | 0.044          | 0.5<br>37                     | 0.43<br>7      |
| Ethyl<br>Oleate                                                                                                                                                                                                     | Pearson<br>Correlation | -<br><b>0.36</b><br><b>2*</b> | -<br>0.30<br>9 | -<br>0.092              | <b>0.34</b><br><b>5*</b> | 0.0<br>51                     | <b>0.3</b><br><b>34*</b>      | 0.21<br>4                 | 0.0<br>26                     | 0.0<br>20      | -<br>0.2<br>20                | 0.1<br>90                     | <b>0.3</b><br><b>93*</b>      | 0.214              | <b>0.437*</b><br>* | <b>0.473**</b> | 0.2<br>37                     | -<br>0.21<br>6 |
|                                                                                                                                                                                                                     | Sig. (2-tailed)        | 0.03<br>0                     | 0.06<br>7      | 0.594                   | 0.03<br>9                | 0.7<br>69                     | 0.0<br>47                     | 0.21<br>1                 | 0.8<br>78                     | 0.9<br>10      | 0.1<br>97                     | 0.2<br>66                     | 0.0<br>18                     | 0.210              | 0.008              | 0.004          | 0.1<br>64                     | 0.20<br>5      |
| GABA – $\gamma$ -aminobutyric acid. ** Correlation is significant at the 0.01 level (2-tailed). * Correlation is significant at the 0.05 level (2-tailed). In<br><b>Bold</b> letters are marked significant values. |                        |                               |                |                         |                          |                               |                               |                           |                               |                |                               |                               |                               |                    |                    |                |                               |                |

**Table S12.** Significance of analysed factors (different growing conditions of lentils, different fermentation conditions, and different duration of fermentation) and their interaction in volatile compound (VC) lentil wholemeal composition.

| Factor             | Dependent variable                                                          | p      |
|--------------------|-----------------------------------------------------------------------------|--------|
| Growing conditions | Hexanal                                                                     | <0.001 |
|                    | 2-Hexenal                                                                   | <0.001 |
|                    | 1-Hexanol                                                                   | <0.001 |
|                    | Hept-2-enal                                                                 | <0.001 |
|                    | Benzaldehyde                                                                | <0.001 |
|                    | Vinyl amyl carbinol                                                         | <0.001 |
|                    | Hexanoic acid                                                               | <0.001 |
|                    | Acetic acid hexyl ester                                                     | <0.001 |
|                    | Oct-3-en-2-one                                                              | <0.001 |
|                    | Phenylacetaldehyde                                                          | <0.001 |
|                    | Oct-2-enal                                                                  | 0.345  |
|                    | Octahydro-2,3'-bifuran                                                      | <0.001 |
|                    | Nonanal                                                                     | <0.001 |
|                    | Phenethyl alcohol                                                           | <0.001 |
|                    | 2-ethylhexanoic acid                                                        | <0.001 |
|                    | Non-2-enal                                                                  | <0.001 |
|                    | Octanoic acid                                                               | 0.640  |
|                    | Decanal                                                                     | <0.001 |
|                    | Nona-2,4-dienal                                                             | 0.457  |
|                    | Dec-2-enal                                                                  | <0.001 |
|                    | Nonanoic acid                                                               | <0.001 |
|                    | Anethole                                                                    | <0.001 |
|                    | Tridecane                                                                   | <0.001 |
|                    | Undecanal                                                                   | <0.001 |
|                    | 2-methylpropanoic acid 2,2-dimethyl-1-(2-hydroxy-1-methylethyl)propyl ester | <0.001 |
|                    | Eugenol                                                                     | <0.001 |
|                    | 2-methylpropanoic acid 2-ethyl-3-hydroxyhexyl ester                         | 0.009  |
|                    | $\beta$ -Damascenone                                                        | <0.001 |
|                    | 1-Tetradecene                                                               | <0.001 |
|                    | Tetradecane                                                                 | <0.001 |
|                    | Dodecanal                                                                   | <0.001 |
|                    | 3-(2,2,6-Trimethyl-7-oxabicyclo[4.1.0]heptan-1-yl)prop-2-enal               | <0.001 |
|                    | Tridecanal                                                                  | <0.001 |
|                    | ((Butoxymethylethoxy)methylethoxy)-propanol                                 | 0.632  |
|                    | Hexadecane                                                                  | <0.001 |
|                    | Tetradecanal                                                                | <0.001 |
|                    | Tridecanedial                                                               | <0.001 |
|                    | Pentadecanal                                                                | <0.001 |
|                    | cis,cis-7,10,-Hexadecadienal                                                | <0.001 |

|                      |                                                                             |        |
|----------------------|-----------------------------------------------------------------------------|--------|
| Type of fermentation | 7-Hexadecenal                                                               | <0.001 |
|                      | 11-Hexadecyn-1-ol                                                           | <0.001 |
|                      | 14-methyl-8-Hexadecenal                                                     | <0.001 |
|                      | Methyl hexadecanoate                                                        | <0.001 |
|                      | Hexadecanoic acid ethyl ester                                               | 0.006  |
|                      | Ethyl Oleate                                                                | <0.001 |
|                      | Hexanal                                                                     | <0.001 |
|                      | 2-Hexenal                                                                   | <0.001 |
|                      | 1-Hexanol                                                                   | <0.001 |
|                      | Hept-2-enal                                                                 | <0.001 |
|                      | Benzaldehyde                                                                | <0.001 |
|                      | Vinyl amyl carbinol                                                         | <0.001 |
|                      | Hexanoic acid                                                               | 0.002  |
|                      | Acetic acid hexyl ester                                                     | <0.001 |
|                      | Oct-3-en-2-one                                                              | <0.001 |
|                      | Phenylacetaldehyde                                                          | <0.001 |
|                      | Oct-2-enal                                                                  | <0.001 |
|                      | Octahydro-2,3'-bifuran                                                      | <0.001 |
|                      | Nonanal                                                                     | <0.001 |
|                      | Phenethyl alcohol                                                           | <0.001 |
|                      | 2-ethylhexanoic acid                                                        | <0.001 |
|                      | Non-2-enal                                                                  | <0.001 |
|                      | Octanoic acid                                                               | <0.001 |
|                      | Decanal                                                                     | 0.483  |
|                      | Nona-2,4-dienal                                                             | <0.001 |
|                      | Dec-2-enal                                                                  | <0.001 |
|                      | Nonanoic acid                                                               | 0.008  |
|                      | Anethole                                                                    | <0.001 |
|                      | Tridecane                                                                   | <0.001 |
|                      | Undecanal                                                                   | <0.001 |
|                      | 2-methylpropanoic acid 2,2-dimethyl-1-(2-hydroxy-1-methylethyl)propyl ester | <0.001 |
|                      | Eugenol                                                                     | <0.001 |
|                      | 2-methylpropanoic acid 2-ethyl-3-hydroxyhexyl ester                         | <0.001 |
|                      | $\beta$ -Damascenone                                                        | <0.001 |
|                      | 1-Tetradecene                                                               | <0.001 |
|                      | Tetradecane                                                                 | <0.001 |
|                      | Dodecanal                                                                   | <0.001 |
|                      | 3-(2,2,6-Trimethyl-7-oxabicyclo[4.1.0]heptan-1-yl)prop-2-enal               | <0.001 |
|                      | Tridecanal                                                                  | <0.001 |
|                      | ((Butoxymethylethoxy)methylethoxy)-propanol                                 | <0.001 |
|                      | Hexadecane                                                                  | <0.001 |
|                      | Tetradecanal                                                                | <0.001 |
|                      | Tridecanedial                                                               | <0.001 |
|                      | Pentadecanal                                                                | <0.001 |

|  |                                                                             |        |
|--|-----------------------------------------------------------------------------|--------|
|  | cis,cis-7,10,-Hexadecadienal                                                | <0.001 |
|  | 7-Hexadecenal                                                               | <0.001 |
|  | 11-Hexadecyn-1-ol                                                           | <0.001 |
|  | 14-methyl-8-Hexadecenal                                                     | <0.001 |
|  | Methyl hexadecanoate                                                        | <0.001 |
|  | Hexadecanoic acid ethyl ester                                               | <0.001 |
|  | Ethyl Oleate                                                                | <0.001 |
|  | Hexanal                                                                     | <0.001 |
|  | 2-Hexenal                                                                   | <0.001 |
|  | 1-Hexanol                                                                   | 0.146  |
|  | Hept-2-enal                                                                 | 0.002  |
|  | Benzaldehyde                                                                | <0.001 |
|  | Vinyl amyl carbinol                                                         | <0.001 |
|  | Hexanoic acid                                                               | <0.001 |
|  | Acetic acid hexyl ester                                                     | <0.001 |
|  | Oct-3-en-2-one                                                              | <0.001 |
|  | Phenylacetaldehyde                                                          | <0.001 |
|  | Oct-2-enal                                                                  | <0.001 |
|  | Octahydro-2,3'-bifuran                                                      | <0.001 |
|  | Nonanal                                                                     | <0.001 |
|  | Phenethyl alcohol                                                           | <0.001 |
|  | 2-ethylhexanoic acid                                                        | <0.001 |
|  | Non-2-enal                                                                  | <0.001 |
|  | Octanoic acid                                                               | <0.001 |
|  | Decanal                                                                     | <0.001 |
|  | Nona-2,4-dienal                                                             | <0.001 |
|  | Dec-2-enal                                                                  | <0.001 |
|  | Nonanoic acid                                                               | <0.001 |
|  | Anethole                                                                    | 0.755  |
|  | Tridecane                                                                   | <0.001 |
|  | Undecanal                                                                   | <0.001 |
|  | 2-methylpropanoic acid 2,2-dimethyl-1-(2-hydroxy-1-methylethyl)propyl ester | <0.001 |
|  | Eugenol                                                                     | <0.001 |
|  | 2-methylpropanoic acid 2-ethyl-3-hydroxyhexyl ester                         | 0.024  |
|  | $\beta$ -Damascenone                                                        | <0.001 |
|  | 1-Tetradecene                                                               | <0.001 |
|  | Tetradecane                                                                 | <0.001 |
|  | Dodecanal                                                                   | <0.001 |
|  | 3-(2,2,6-Trimethyl-7-oxabicyclo[4.1.0]heptan-1-yl)prop-2-enal               | <0.001 |
|  | Tridecanal                                                                  | <0.001 |
|  | ((Butoxymethylethoxy)methylethoxy)-propanol                                 | <0.001 |
|  | Hexadecane                                                                  | 0.003  |
|  | Tetradecanal                                                                | <0.001 |
|  | Tridecanedial                                                               | <0.001 |

Fermentation duration

|                                              |                                                                             |        |
|----------------------------------------------|-----------------------------------------------------------------------------|--------|
| Growing conditions *<br>Type of fermentation | Pentadecanal                                                                | <0.001 |
|                                              | cis,cis-7,10,-Hexadecadienal                                                | <0.001 |
|                                              | 7-Hexadecenal                                                               | <0.001 |
|                                              | 11-Hexadecyn-1-ol                                                           | <0.001 |
|                                              | 14-methyl-8-Hexadecenal                                                     | <0.001 |
|                                              | Methyl hexadecanoate                                                        | <0.001 |
|                                              | Hexadecanoic acid ethyl ester                                               | <0.001 |
|                                              | Ethyl Oleate                                                                | <0.001 |
|                                              | Hexanal                                                                     | <0.001 |
|                                              | 2-Hexenal                                                                   | <0.001 |
|                                              | 1-Hexanol                                                                   | <0.001 |
|                                              | Hept-2-enal                                                                 | <0.001 |
|                                              | Benzaldehyde                                                                | <0.001 |
|                                              | Vinyl amyl carbinol                                                         | <0.001 |
|                                              | Hexanoic acid                                                               | 0.514  |
|                                              | Acetic acid hexyl ester                                                     | <0.001 |
|                                              | Oct-3-en-2-one                                                              | <0.001 |
|                                              | Phenylacetaldehyde                                                          | <0.001 |
|                                              | Oct-2-enal                                                                  | <0.001 |
|                                              | Octahydro-2,3'-bifuran                                                      | <0.001 |
|                                              | Nonanal                                                                     | 0.140  |
|                                              | Phenethyl alcohol                                                           | <0.001 |
|                                              | 2-ethylhexanoic acid                                                        | <0.001 |
|                                              | Non-2-enal                                                                  | <0.001 |
|                                              | Octanoic acid                                                               | 0.051  |
|                                              | Decanal                                                                     | <0.001 |
|                                              | Nona-2,4-dienal                                                             | 0.457  |
|                                              | Dec-2-enal                                                                  | <0.001 |
|                                              | Nonanoic acid                                                               | <0.001 |
|                                              | Anethole                                                                    | <0.001 |
|                                              | Tridecane                                                                   | <0.001 |
|                                              | Undecanal                                                                   | <0.001 |
|                                              | 2-methylpropanoic acid 2,2-dimethyl-1-(2-hydroxy-1-methylethyl)propyl ester | <0.001 |
|                                              | Eugenol                                                                     | <0.001 |
|                                              | 2-methylpropanoic acid 2-ethyl-3-hydroxyhexyl ester                         | <0.001 |
|                                              | $\beta$ -Damascenone                                                        | <0.001 |
|                                              | 1-Tetradecene                                                               | <0.001 |
|                                              | Tetradecane                                                                 | <0.001 |
|                                              | Dodecanal                                                                   | 0.372  |
|                                              | 3-(2,2,6-Trimethyl-7-oxabicyclo[4.1.0]heptan-1-yl)prop-2-enal               | <0.001 |
|                                              | Tridecanal                                                                  | <0.001 |
|                                              | ((Butoxymethylethoxy)methylethoxy)-propanol                                 | <0.001 |
|                                              | Hexadecane                                                                  | <0.001 |
|                                              | Tetradecanal                                                                | <0.001 |

|                                               |                                                                             |        |
|-----------------------------------------------|-----------------------------------------------------------------------------|--------|
| Growing conditions *<br>Fermentation duration | Tridecanedial                                                               | <0.001 |
|                                               | Pentadecanal                                                                | <0.001 |
|                                               | cis,cis-7,10,-Hexadecadienal                                                | <0.001 |
|                                               | 7-Hexadecenal                                                               | <0.001 |
|                                               | 11-Hexadecyn-1-ol                                                           | <0.001 |
|                                               | 14-methyl-8-Hexadecenal                                                     | <0.001 |
|                                               | Methyl hexadecanoate                                                        | <0.001 |
|                                               | Hexadecanoic acid ethyl ester                                               | <0.001 |
|                                               | Ethyl Oleate                                                                | <0.001 |
|                                               | Hexanal                                                                     | <0.001 |
|                                               | 2-Hexenal                                                                   | <0.001 |
|                                               | 1-Hexanol                                                                   | <0.001 |
|                                               | Hept-2-enal                                                                 | <0.001 |
|                                               | Benzaldehyde                                                                | 0.108  |
|                                               | Vinyl amyl carbinol                                                         | <0.001 |
|                                               | Hexanoic acid                                                               | <0.001 |
|                                               | Acetic acid hexyl ester                                                     | <0.001 |
|                                               | Oct-3-en-2-one                                                              | <0.001 |
|                                               | Phenylacetaldehyde                                                          | <0.001 |
|                                               | Oct-2-enal                                                                  | 0.004  |
|                                               | Octahydro-2,3'-bifuran                                                      | <0.001 |
|                                               | Nonanal                                                                     | 0.983  |
|                                               | Phenethyl alcohol                                                           | <0.001 |
|                                               | 2-ethylhexanoic acid                                                        | <0.001 |
|                                               | Non-2-enal                                                                  | 0.279  |
|                                               | Octanoic acid                                                               | 0.002  |
|                                               | Decanal                                                                     | <0.001 |
|                                               | Nona-2,4-dienal                                                             | 0.457  |
|                                               | Dec-2-enal                                                                  | <0.001 |
|                                               | Nonanoic acid                                                               | <0.001 |
|                                               | Anethole                                                                    | 0.755  |
|                                               | Tridecane                                                                   | <0.001 |
|                                               | Undecanal                                                                   | <0.001 |
|                                               | 2-methylpropanoic acid 2,2-dimethyl-1-(2-hydroxy-1-methylethyl)propyl ester | <0.001 |
|                                               | Eugenol                                                                     | <0.001 |
|                                               | 2-methylpropanoic acid 2-ethyl-3-hydroxyhexyl ester                         | <0.001 |
|                                               | $\beta$ -Damascenone                                                        | <0.001 |
|                                               | 1-Tetradecene                                                               | <0.001 |
|                                               | Tetradecane                                                                 | 0.012  |
|                                               | Dodecanal                                                                   | <0.001 |
|                                               | 3-(2,2,6-Trimethyl-7-oxabicyclo[4.1.0]heptan-1-yl)prop-2-enal               | <0.001 |
|                                               | Tridecanal                                                                  | <0.001 |
|                                               | ((Butoxymethylethoxy)methylethoxy)-propanol                                 | 0.396  |
|                                               | Hexadecane                                                                  | <0.001 |

|                                                 |                                                                             |        |
|-------------------------------------------------|-----------------------------------------------------------------------------|--------|
| Type of fermentation *<br>Fermentation duration | Tetradecanal                                                                | <0.001 |
|                                                 | Tridecanedial                                                               | <0.001 |
|                                                 | Pentadecanal                                                                | <0.001 |
|                                                 | cis,cis-7,10,-Hexadecadienal                                                | <0.001 |
|                                                 | 7-Hexadecenal                                                               | <0.001 |
|                                                 | 11-Hexadecyn-1-ol                                                           | <0.001 |
|                                                 | 14-methyl-8-Hexadecenal                                                     | <0.001 |
|                                                 | Methyl hexadecanoate                                                        | <0.001 |
|                                                 | Hexadecanoic acid ethyl ester                                               | <0.001 |
|                                                 | Ethyl Oleate                                                                | <0.001 |
|                                                 | Hexanal                                                                     | <0.001 |
|                                                 | 2-Hexenal                                                                   | <0.001 |
|                                                 | 1-Hexanol                                                                   | 0.081  |
|                                                 | Hept-2-enal                                                                 | <0.001 |
|                                                 | Benzaldehyde                                                                | <0.001 |
|                                                 | Vinyl amyl carbinol                                                         | <0.001 |
|                                                 | Hexanoic acid                                                               | <0.001 |
|                                                 | Acetic acid hexyl ester                                                     | <0.001 |
|                                                 | Oct-3-en-2-one                                                              | <0.001 |
|                                                 | Phenylacetaldehyde                                                          | <0.001 |
|                                                 | Oct-2-enal                                                                  | <0.001 |
|                                                 | Octahydro-2,3'-bifuran                                                      | <0.001 |
|                                                 | Nonanal                                                                     | <0.001 |
|                                                 | Phenethyl alcohol                                                           | 0.010  |
|                                                 | 2-ethylhexanoic acid                                                        | 0.623  |
|                                                 | Non-2-enal                                                                  | <0.001 |
|                                                 | Octanoic acid                                                               | 0.189  |
|                                                 | Decanal                                                                     | <0.001 |
|                                                 | Nona-2,4-dienal                                                             | <0.001 |
|                                                 | Dec-2-enal                                                                  | <0.001 |
|                                                 | Nonanoic acid                                                               | <0.001 |
|                                                 | Anethole                                                                    | <0.001 |
|                                                 | Tridecane                                                                   | <0.001 |
|                                                 | Undecanal                                                                   | <0.001 |
|                                                 | 2-methylpropanoic acid 2,2-dimethyl-1-(2-hydroxy-1-methylethyl)propyl ester | 0.989  |
|                                                 | Eugenol                                                                     | <0.001 |
|                                                 | 2-methylpropanoic acid 2-ethyl-3-hydroxyhexyl ester                         | <0.001 |
|                                                 | $\beta$ -Damascenone                                                        | <0.001 |
|                                                 | 1-Tetradecene                                                               | <0.001 |
|                                                 | Tetradecane                                                                 | <0.001 |
|                                                 | Dodecanal                                                                   | <0.001 |
|                                                 | 3-(2,2,6-Trimethyl-7-oxabicyclo[4.1.0]heptan-1-yl)prop-2-enal               | <0.001 |
|                                                 | Tridecanal                                                                  | <0.001 |
|                                                 | ((Butoxymethylethoxy)methylethoxy)-propanol                                 | <0.001 |

|                                                                         |                                                                             |        |
|-------------------------------------------------------------------------|-----------------------------------------------------------------------------|--------|
| Growing conditions *<br>Type of fermentation *<br>Fermentation duration | Hexadecane                                                                  | 0.075  |
|                                                                         | Tetradecanal                                                                | <0.001 |
|                                                                         | Tridecanedial                                                               | <0.001 |
|                                                                         | Pentadecanal                                                                | <0.001 |
|                                                                         | cis,cis-7,10,-Hexadecadienal                                                | <0.001 |
|                                                                         | 7-Hexadecenal                                                               | <0.001 |
|                                                                         | 11-Hexadecyn-1-ol                                                           | <0.001 |
|                                                                         | 14-methyl-8-Hexadecenal                                                     | <0.001 |
|                                                                         | Methyl hexadecanoate                                                        | <0.001 |
|                                                                         | Hexadecanoic acid ethyl ester                                               | <0.001 |
|                                                                         | Ethyl Oleate                                                                | <0.001 |
|                                                                         | Hexanal                                                                     | <0.001 |
|                                                                         | 2-Hexenal                                                                   | <0.001 |
|                                                                         | 1-Hexanol                                                                   | <0.001 |
|                                                                         | Hept-2-enal                                                                 | 0.017  |
|                                                                         | Benzaldehyde                                                                | <0.001 |
|                                                                         | Vinyl amyl carbinol                                                         | <0.001 |
|                                                                         | Hexanoic acid                                                               | <0.001 |
|                                                                         | Acetic acid hexyl ester                                                     | <0.001 |
|                                                                         | Oct-3-en-2-one                                                              | <0.001 |
|                                                                         | Phenylacetaldehyde                                                          | <0.001 |
|                                                                         | Oct-2-enal                                                                  | <0.001 |
|                                                                         | Octahydro-2,3'-bifuran                                                      | <0.001 |
|                                                                         | Nonanal                                                                     | 0.050  |
|                                                                         | Phenethyl alcohol                                                           | <0.001 |
|                                                                         | 2-ethylhexanoic acid                                                        | <0.001 |
|                                                                         | Non-2-enal                                                                  | <0.001 |
|                                                                         | Octanoic acid                                                               | 0.146  |
|                                                                         | Decanal                                                                     | <0.001 |
|                                                                         | Nona-2,4-dienal                                                             | 0.457  |
|                                                                         | Dec-2-enal                                                                  | <0.001 |
|                                                                         | Nonanoic acid                                                               | <0.001 |
|                                                                         | Anethole                                                                    | <0.001 |
|                                                                         | Tridecane                                                                   | <0.001 |
|                                                                         | Undecanal                                                                   | <0.001 |
|                                                                         | 2-methylpropanoic acid 2,2-dimethyl-1-(2-hydroxy-1-methylethyl)propyl ester | <0.001 |
|                                                                         | Eugenol                                                                     | <0.001 |
|                                                                         | 2-methylpropanoic acid 2-ethyl-3-hydroxyhexyl ester                         | <0.001 |
|                                                                         | $\beta$ -Damascenone                                                        | <0.001 |
|                                                                         | 1-Tetradecene                                                               | <0.001 |
|                                                                         | Tetradecane                                                                 | 0.002  |
|                                                                         | Dodecanal                                                                   | <0.001 |
|                                                                         | 3-(2,2,6-Trimethyl-7-oxabicyclo[4.1.0]heptan-1-yl)prop-2-enal               | <0.001 |
|                                                                         | Tridecanal                                                                  | <0.001 |

|                                             |                  |
|---------------------------------------------|------------------|
| ((Butoxymethylethoxy)methylethoxy)-propanol | <b>&lt;0.001</b> |
| Hexadecane                                  | <b>&lt;0.001</b> |
| Tetradecanal                                | <b>&lt;0.001</b> |
| Tridecanedial                               | <b>&lt;0.001</b> |
| Pentadecanal                                | <b>&lt;0.001</b> |
| cis,cis-7,10,-Hexadecadienal                | <b>&lt;0.001</b> |
| 7-Hexadecenol                               | <b>&lt;0.001</b> |
| 11-Hexadecyn-1-ol                           | <b>&lt;0.001</b> |
| 14-methyl-8-Hexadecenol                     | <b>&lt;0.001</b> |
| Methyl hexadecanoate                        | <b>&lt;0.001</b> |
| Hexadecanoic acid ethyl ester               | <b>&lt;0.001</b> |
| Ethyl Oleate                                | <b>&lt;0.001</b> |

p – significance. The influence of analysed factors and their interaction are significant when  $p \leq 0.05$ . In **Bold** letters are marked significant values.

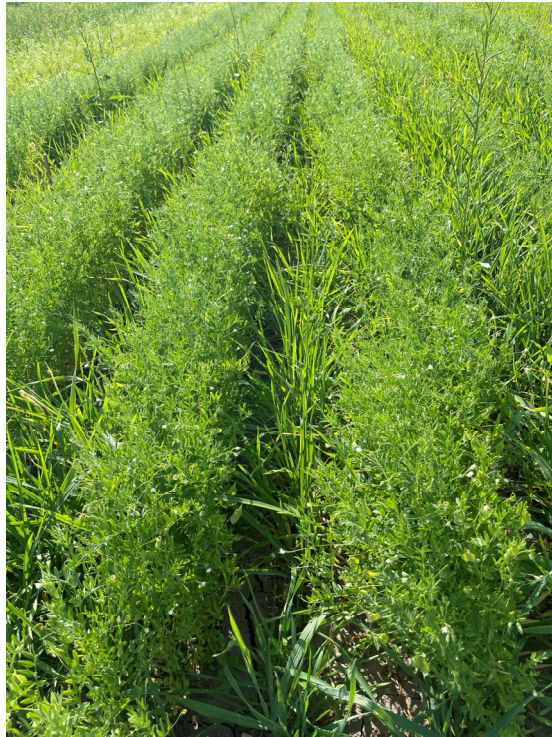

**Figure S1.** Image of the relay intercropped lentil with winter rye (LR).
